1  
2  
3  
4  
5  
6  
7  
8  
9  
10  
11  
12  
13  
14  
15  
16  
17  
18  
19  
20  
21  
22  
23  
24  
25  
26  
27

# **Recruitment of KRAS downstream target ARL4C to membrane protrusions accelerates pancreatic cancer cell invasion**

**Akikazu Harada<sup>1</sup>, Shinji Matsumoto<sup>1</sup>, Yoshiaki Yasumizu<sup>3</sup>,  
Toshiyuki Akama<sup>1</sup>, Hidetoshi Eguchi<sup>2</sup>, and Akira Kikuchi<sup>1\*</sup>**

Departments of <sup>1</sup>Molecular Biology and Biochemistry, <sup>2</sup>Gastrointestinal Surgery, Graduate School of  
Medicine, <sup>3</sup>Laboratory of Experimental Immunology, WPI Frontier Immunology Research Center,  
Osaka University, 2-2 Yamadaoka, Suita, Osaka 565-0871, Japan

\*Correspondence author. Department of Molecular Biology and Biochemistry, Graduate School of  
Medicine, Osaka University, 2-2 Yamadaoka, Suita 565-0871, Japan. Phone, 81-6-6879-3410. Fax,  
81-6-6879-3419. E-mail: [akikuchi@molbiobc.med.osaka-u.ac.jp](mailto:akikuchi@molbiobc.med.osaka-u.ac.jp)

**Running title** ARL4C-IQGAP1-MMP14 signaling axis in pancreatic cancer

**Conflict of interest** All authors have declared no conflicts of interest.

Figures 1-7 and associated legends.

Table 1.

1 **Abstract**

2

3 Pancreatic cancer (PC) has a high mortality rate due to metastasis. Whereas KRAS is mutated in  
4 most PC patients, controlling KRAS or its downstream effectors has not been succeeded clinically.  
5 ARL4C is a small G protein whose expression is induced by the Wnt and EGF–RAS pathways. In  
6 the present study, we found that ARL4C is frequently overexpressed in PC patients and showed that  
7 its unique localization to membrane protrusions is required for cancer cell invasion. IQGAP1 was  
8 identified as a novel interacting protein for ARL4C. ARL4C recruited IQGAP1 and its downstream  
9 effector, MMP14, to membrane protrusions. Specific localization of ARL4C, IQGAP1, and MMP14  
10 was the active site of invasion, which induced degradation of the extracellular matrix. Moreover,  
11 subcutaneously injected antisense oligonucleotide (ASO) against ARL4C into tumor-bearing mice  
12 suppressed metastasis of PC. These results suggest that ARL4C–IQGAP1–MMP14 signaling is  
13 activated at membrane protrusions of PC cells.

14

## 1 **Introduction**

2

3 Pancreatic cancer is extremely aggressive and exhibits poor prognosis, with a 5-year survival of only  
4 5%(Klein, 2013). Most pancreatic cancer-related deaths are due to metastatic disease, and more than  
5 80% of patients have either locally advanced or metastatic disease(Hidalgo, 2010; Klein, 2013).

6 Genome sequencing analysis has revealed the mutational landscape of pancreatic cancer and KRAS  
7 mutations are considered an initiating event in pancreatic ductal cells(Collins et al, 2012; Waddell et  
8 al, 2015). Irrespective of our improved understanding of tumor biology, the treatment outcome has  
9 not changed in the past 30 years. Therefore, new innovative treatment options need to be tested based  
10 on better understanding of the characteristics of pancreatic cancer.

11 ARL4C is a member of the ADP-ribosylation factor (ARF)-like protein (ARL) family, which  
12 belongs to the ARF protein subgroup of the small GTP-binding protein superfamily(Engel et al, 2004;  
13 Matsumoto et al, 2017; Wei et al, 2009). Cytohesin2/ARF nucleotide-binding site opener (ARNO), a  
14 GDP/GTP exchange factor of ARF family proteins, has been identified as a direct effector  
15 protein(Hofmann et al, 2007). ARL4C is expressed through activation of Wnt- $\beta$ -catenin and EGF-  
16 RAS signaling and plays important roles in both epithelial morphogenesis and  
17 tumorigenesis(Matsumoto et al, 2017; Matsumoto et al, 2014). Because aberrant activation of the Wnt-  
18  $\beta$ -catenin and/or EGF-RAS pathways are frequently observed in various types of cancers, ARL4C is  
19 indeed expressed in a number of cancers(Fujii et al, 2015; Fujii et al, 2016). In colon and lung cancer  
20 cells, ARL4C promotes cell proliferation through ARF6, RAC, RHO, and YAP/TAZ. On the other  
21 hand, in liver cancer cells, ARL4C promotes cell proliferation through phosphatidylinositol 3 kinase  $\delta$   
22 (PI3K $\delta$ )(Harada et al, 2019). Thus, ARL4C would activate different downstream pathways in a cancer  
23 cell context-dependent manner. These prompted us to study the involvement of ARL4C, as a KRAS  
24 downstream molecule, in aggressiveness of pancreatic cancer, and IQGAP1 was identified as a binding  
25 protein of ARL4C.

1 IQ-domain GTPase-activation proteins (IQGAPs) are an evolutionally conserved family of  
2 proteins that bind to a diverse array of signaling and structural proteins(Hedman et al, 2015).  
3 Mammalian IQGAP1 is a well-characterized member of the IQGAP family and a fundamental  
4 regulator of cytoskeletal function(Briggs & Sacks, 2003). IQGAP1 is highly expressed in the tumor  
5 lesions and suggested to be involved in cancer cell metastasis(Johnson et al, 2009). (Sakurai-Yageta et  
6 al, 2008)Here, we show that ARL4C bound to IQGAP1 and recruited IQGAP1 and membrane type 1-  
7 matrix metalloproteinase (MT1-MMP, also called MMP14)(Sakurai-Yageta et al, 2008) to membrane  
8 protrusions in a phosphatidylinositol (3,4,5)-trisphosphate (PIP3)-dependent manner and accelerated  
9 invasion. In addition, ARL4C antisense oligonucleotide (ASO) suppressed the lymph node metastases  
10 of pancreatic cancer cells orthotopically implanted into the pancreas of immunodeficient mice. These  
11 results suggest that the ARL4C–IQGAP1–MMP14 signaling axis promotes pancreatic cancer  
12 aggressiveness and that ARL4C is a novel molecular target for the treatment of pancreatic cancer.

13

## 14 **Results**

15

### 16 **ARL4C is expressed in human pancreatic cancer**

17 Whether ARL4C is expressed in pancreatic cancer patients was examined using  
18 immunohistochemistry. Fifty-seven pancreatic ductal adenocarcinoma (PDAC) patients without  
19 preoperative chemotherapy were classified into two groups, depending on ARL4C expression levels  
20 (high and low) (Figure 1A). High expression of ARL4C was observed in 47 cases (82%), but  
21 minimally detected in non-tumor regions of pancreatic ducts (Figure 1A). Anti-ARL4C antibody  
22 used in this study was validated in Western blotting and immunohistochemical assay (IHC) (Figure  
23 1-figure supplement 1A and B). A significant difference was observed between low and high ARL4C  
24 expression based on perineural invasion (Supplementary file 1 Table 1). Because the perineural  
25 invasion is considered as one of the causes of the recurrence and metastasis after pancreatic resection  
26 (Liang et al, 2016), ARL4C expression may be correlated with the ability of cancer cell invasion.

1 Consistently, ARL4C expression was correlated with decreased overall survival (Figure 1B). Similar  
2 results were obtained in the analysis of TCGA and GTEx datasets (Figure 1C and D). Univariate and  
3 multivariate analysis revealed that higher ARL4C expression was an independent prognostic factor  
4 (Table 1). Taken together, these results indicate that high expression of ARL4C is correlated with the  
5 aggressiveness and poor prognosis of pancreatic cancer.

6 In cultured pancreatic cancer cell lines, ARL4C was highly expressed in S2-CP8 and PANC-1  
7 cells and it was barely detected in BxPC-3 cells (Figure 1E). Consistent with the previous results  
8 with IEC6 rat intestinal epithelial cells and colorectal and lung cancer cells (Fujii et al, 2015;  
9 Matsumoto et al, 2014), the MEK inhibitors PD184161 and U0126 and siRNAs for  $\beta$ -catenin and  
10 KRAS decreased ARL4C expression in S2-CP8 and PANC-1 cells (Figure 1F–H). In addition,  
11 simultaneous knockdown of KRAS and  $\beta$ -catenin further suppressed ARL4C expression (Figure 1I).  
12 Taken together, these results suggest that ARL4C is expressed in pancreatic cancer cells through  
13 activated RAS–MAP kinase and Wnt– $\beta$ -catenin pathways.

14

### 15 **ARL4C expression is involved in the invasion of pancreatic cancer cells**

16 ARL4C ASO-1316 has been shown to inhibit growth of xenograft tumors induced by colon and lung  
17 cancer cells (Harada et al, 2019; Kimura et al, 2020). However, ARL4C ASO-1316 had little effect on  
18 sphere formation of pancreatic cancer cell (Figure 2-figure supplement 1A). Since the  
19 clinicopathological analysis of human pancreatic cancer specimens indicates that ARL4C expression  
20 may be correlated with invasive ability, migratory and invasive abilities of S2-CP8 and PANC-1 cells  
21 were studied in Boyden chamber assays. ARL4C ASO-1316 inhibited the migratory and invasive  
22 abilities with dominant effects on invasion (Figure 2A and B; Figure 2-figure supplement 1B).  
23 Inhibition of migratory and invasive abilities by ARL4C ASO, targeting the non-coding region of  
24 *ARL4C* mRNA, was not observed in the cells expressing ARL4C-GFP ectopically (Figure 2C and D;  
25 Figure 2-figure supplement 1C). ARL4C is unique in that it is locked to the GTP-bound active form  
26 and localized to membrane protrusions of IEC6 and Madin-Darby canine kidney (MDCK)

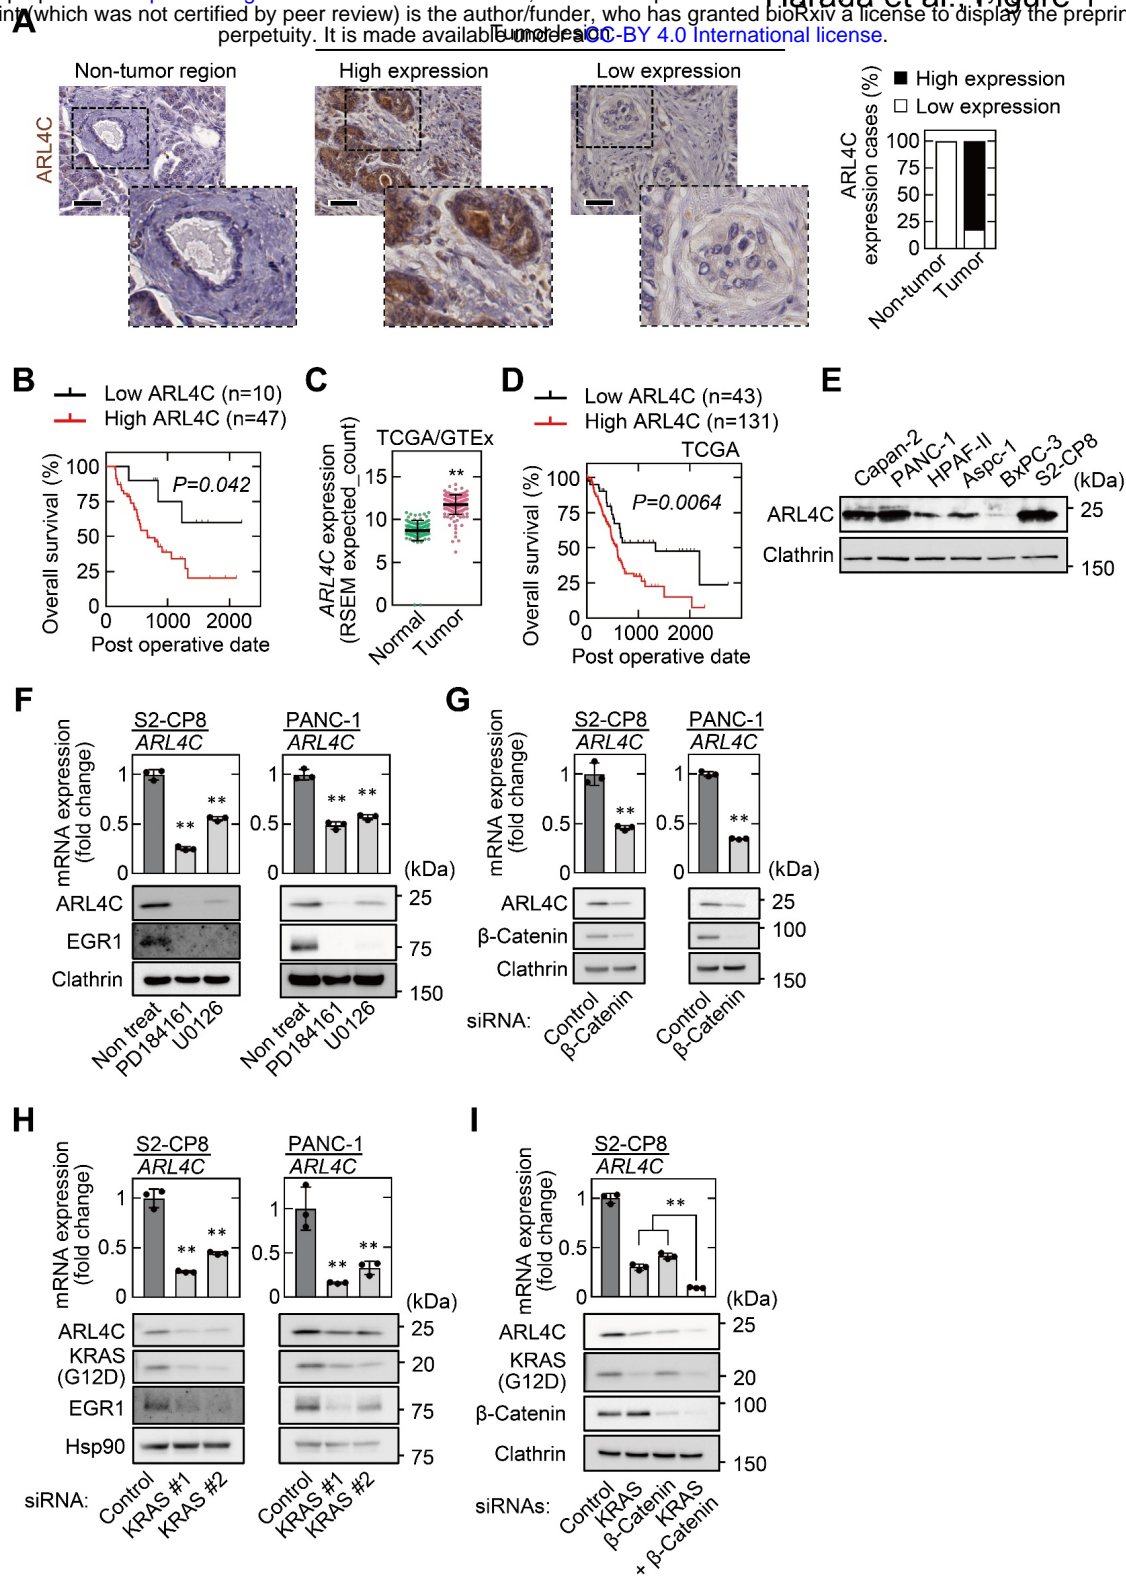

**Figure 1.**

**ARL4C is expressed in human pancreatic cancer.**

**A**, PDAC tissues (n = 57) were stained with anti-ARL4C antibody and hematoxylin. The percentages of ARL4C expression cases in the non-tumor regions and tumor lesions are shown. **B**, The relationship between overall survival and ARL4C expression in patients with PDAC. **C**, *ARL4C* mRNA levels in pancreatic adenocarcinoma and normal pancreatic tissues were analyzed using TCGA and GTEx datasets. The results shown are scatter plots with the mean  $\pm$  s.e.m. *P* values were calculated using a two-tailed Student's *t*-test. **D**, TCGA RNA sequencing and clinical outcome data for pancreatic cancer were analyzed. **E**, Lysates of the indicated pancreatic cancer cells were probed with the indicated antibodies. **F**, S2-CP8 and PANC-1 cells were treated with 10  $\mu$ M PD184161 or 10  $\mu$ M U0126, and *ARL4C* mRNA levels were measured by quantitative real-time PCR. Relative *ARL4C* mRNA levels were normalized to those of *GAPDH* and expressed as fold changes compared with the levels in control cells. Lysates were probed with the indicated antibodies. **G–I**, S2-CP8 cells and PANC-1 cells were transfected with the indicated siRNAs, and *ARL4C* mRNA levels were measured by quantitative real-time PCR. Relative *ARL4C* mRNA levels were normalized to those of  $\beta$ 2-microglobulin and expressed as fold changes compared with the levels in control cells. Lysates were probed with the indicated antibodies. *EGR1* was used as an established transcription target gene of RAS signaling. **B, D**, Data were analyzed using Kaplan–Meier survival curves, and a log-rank test was used for statistical analysis. **F–I**, Data are shown as the mean  $\pm$  s.d. of 3 independent experiments. *P* values were calculated using a two-tailed Student's *t*-test (**G**) or one-way ANOVA followed by Bonferroni post hoc test (**F, H, I**). Scale bars in **A**, 50  $\mu$ m. \*\*, *P* < 0.01. See Figure 1-source data 1.

1 cells(Matsumoto et al, 2014). ARL4C-GFP was localized to membrane protrusions of S2-CP8 cells  
2 under Matrigel-coated 2D culture conditions (Figure 2-figure supplement 1D). ARL4C<sup>Q72L</sup>-GFP, in  
3 which the amino acid at the same position in a constitutively active RAS mutant was mutated,  
4 showed a similar distribution to ARL4C-GFP, but ARL4C<sup>T27N</sup>-GFP, which is an inactive  
5 form(Hofmann et al, 2007), did not (Figure 2-figure supplement 1D).

6 For visualization of cancer cells invading through the extracellular matrix (ECM)(Poincloux et  
7 al, 2009), a 3D microfluidic cell culture with type I collagen(Farahat et al, 2012; Shin et al, 2012)  
8 (3D gel invasion assay) was performed (Figure 2E). S2-CP8 cells invaded into type I collagen, and  
9 individual cells formed protrusions at the leading side of the cells (Figure 2F). In contrast, ARL4C  
10 knockdown decreased invasive ability (Figure 2F). When the collagen concentration was reduced,  
11 S2-CP8 cells invaded irrespective of ARL4C knockdown (Figure 2G), suggesting that their invasive  
12 ability is not required for cells to move into the ECM when collagen fiber-formed 3D net structures  
13 are sparse. Furthermore, in the 3D gel invasion assay, membrane protrusions were time-dependently  
14 observed in the direction of invasion, and ARL4C-tdTomato accumulated in the tips of membrane  
15 protrusions (Figure 2H; Figure 2-video 1).

16 To visualize the relationship between the localization of ARL4C and matrix degradation, the  
17 steady-state activity of cell-derived collagenase was measured as the dequenched signal emitted from  
18 collagen I fibers with dye-quenched (DQ) FITC (<sup>DQ</sup>collagen I)(Wolf et al, 2007) in the 3D gel  
19 invasion assay. Collagenase-induced fluorescence dequenching was detected in the collagen fibers  
20 crossing the tips of the protrusions but not in the cell body (Figure 2I). Collagenase activity was  
21 decreased when ARL4C was depleted (Figure 2J), suggesting that ARL4C is involved in degradation  
22 of the ECM through its localization to the tips of cell protrusions.

23 While cell protrusions are suggested to be involved in invasion, invadopodia are well-known  
24 membrane protrusions that localize at the ventral surfaces of cells and are active in ECM degradation  
25 during cancer invasion(Murphy & Courtneidge, 2011). To analyze invadopodia, the cells were grown  
26 on gelatin-coated glass coverslips (Figure 2-figure supplement 2A). Dark areas represent



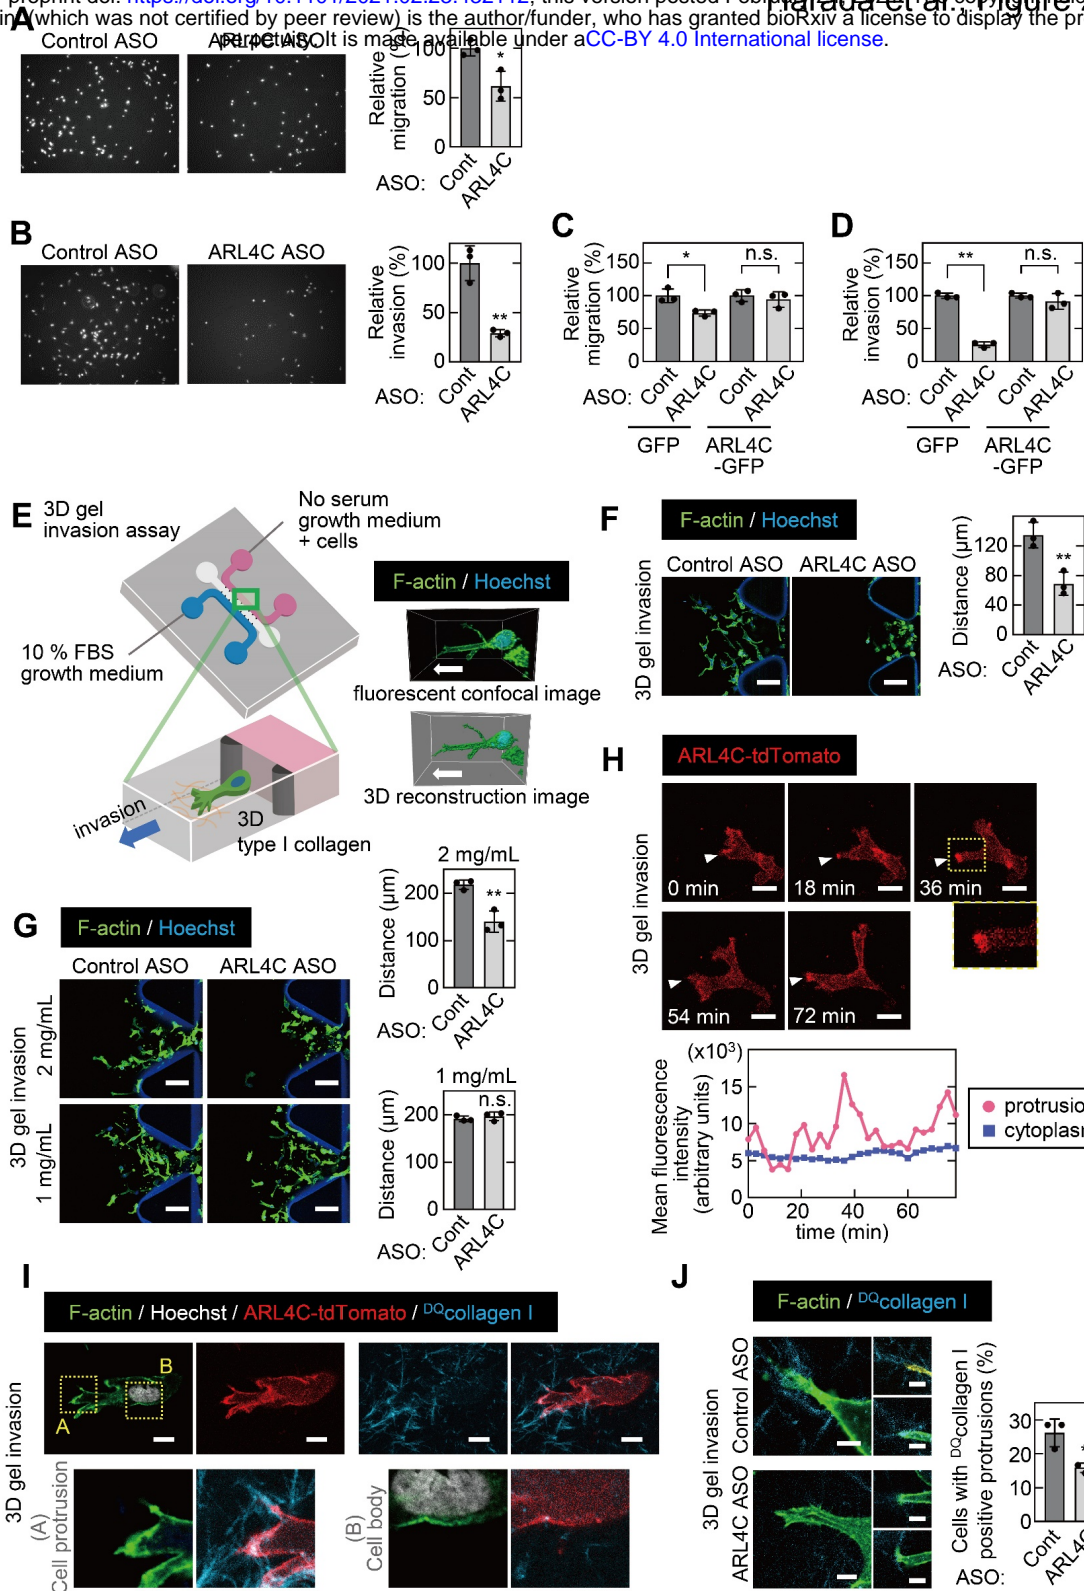

**Figure 2.**

**ARL4C expression is especially involved in the invasion of pancreatic cancer cells.**

**A-D**, S2-CP8 cells (**A,B**) or S2-CP8 cells expressing GFP or ARL4C-GFP (**C,D**) were transfected with control or ARL4C ASO-1316 and subjected to migration (**A,C**) and invasion (**B,D**) assays. Migratory and invasive abilities are expressed as the percentage of the same cells transfected with control ASO. **E**, A schematic illustration of 3D invasion into collagen I gel using a 3D cell culture chip is shown. There is a chemical concentration gradient across the gel channel and cells can invade into the gel. The right panel shows a fluorescent confocal image (top) and a 3D reconstructed image (bottom). **F**, S2-CP8 cells were transfected with control or ARL4C ASO-1316 and subjected to a 3D collagen I gel (2 mg/mL) invasion assay. The distances from the edge of the gel interface of all cells invading into the collagen gel were measured. **G**, The same assay as in (**F**) was performed in the presence of different concentrations of collagen I. **H**, S2-CP8 cells stably expressing ARL4C-tdTomato were observed with time-lapse imaging. Arrowheads indicate the tips of cell protrusions. The region in the yellow dashed squares is shown enlarged in the bottom image. Fluorescence intensities of the cytoplasm and cell protrusions were measured and plotted as a function of time. **I**, S2-CP8 cells expressing ARL4C-tdTomato were subjected to a 3D collagen I gel invasion assay with D<sup>Q</sup>collagen I, and stained with phalloidin and Hoechst 33342. The regions in the yellow dashed squares (**A**, protrusion; **B**, cell body) are enlarged. **J**, S2-CP8 cells transfected with control ASO or ARL4C ASO-1316 were subjected to a 3D collagen I gel invasion assay with D<sup>Q</sup>collagen I. The percentages of cells with D<sup>Q</sup>collagen I-positive protrusions compared with the total number of cells were calculated. **A-D,F,G,J**, Data are shown as the mean  $\pm$  s.d. of 3 independent experiments. *P* values were calculated using a two-tailed Student's *t*-test. Scale bars in **F,G**, 100  $\mu$ m; **H**, 20  $\mu$ m; **I**, 10  $\mu$ m; **J**, 5  $\mu$ m. n.s. not significant. \*, *P* < 0.05; \*\*, *P* < 0.01. See Figure 2-source data 1.



1 gelatinolytic activity of invadopodia and are equal to invadopodia structures. BxPC-3 cells, which  
2 expressed low levels of ARL4C, exhibited invadopodia clearly, whereas S2-CP8 and PANC-1 cells,  
3 which highly express ARL4C, did not (Figure 2-figure supplement 2A). It is notable that S2-CP8 and  
4 PANC-1 cells formed membrane protrusions but BxPC-3 did not. Overexpression of ARL4C-GFP in  
5 BxPC-3 cells (BxPC-3/ARL4C-GFP cells) did not affect the numbers of invadopodia but did  
6 promote invasive ability (Figure 2-figure supplement 2B-D). Wild-type BxPC-3 cells formed a round  
7 shape in 3D culture conditions, whereas BxPC-3/ARL4C-GFP cells formed membrane protrusions  
8 and ARL4C-GFP was observed at the tips of the membrane protrusions (Figure 2-figure supplement  
9 2E and F), suggesting that ARL4C expression is not required for invadopodia formation. Taken  
10 together, ARL4C is localized to membrane protrusions and plays an important role in the invasion of  
11 pancreatic cancer cells.

12

### 13 **IQGAP1 is an ARL4C-interacting protein**

14 ARL4C recruits cytohesin2 to the plasma membrane through their direct interaction in HeLa  
15 cells(Hofmann et al, 2007). In S2-CP8 cells, ARL4C did not bind to cytohesin2 (Figure 3-figure  
16 supplement 1A), and knockdown of cytohesin2 had no effect on the migratory or invasive ability  
17 (Figure 3-figure supplement 1B). Furthermore, cytohesin2 was distributed throughout the cytosol in  
18 S2-CP8 cells, whereas it was localized to the cell periphery of HeLaS3 cells (Figure 3-figure  
19 supplement 1C). Whereas ARL4C ASO inhibited RAC1 activity in A549 cells(Fujii et al, 2015), the  
20 ASO did not affect RAC1 activity in S2-CP8 cells and overexpression of ARL4C did not affect it in  
21 BxPC-3 cells (Figure 3-figure supplement 1D). Although ARL4C induces the nuclear import of  
22 YAP/TAZ in HCT116 cells(Harada et al, 2019), ARL4C knockdown did not inhibit it in pancreatic  
23 cancer cells (Figure 3-figure supplement 1E). These results suggest that cytohesin2 neither functions  
24 downstream of ARL4C nor is involved in migration or invasion of S2-CP8 cells and prompted us to  
25 explore an uncharacterized effector protein of ARL4C.

1 ARL4C-FLAG-HA-binding proteins were precipitated and the precipitates were analyzed by  
2 mass spectrometry (Figure 3A). Among the possible interacting proteins, IQGAP1 was further  
3 studied (Figure 3A; Supplementary file 1 Table 2) because its expression is associated with the  
4 aggressiveness of various types of cancer(Johnson et al, 2009). Ectopically expressed and  
5 endogenous ARL4C were associated with endogenous IQGAP1 in S2-CP8 cells (Figure 3B and C).  
6 ARL4C-FLAG-HA and ARL4C<sup>Q72L</sup>-FLAG-HA formed a complex with GFP-IQGAP1 to the similar  
7 levels, but ARL4C<sup>T27N</sup>-FLAG-HA showed diminished binding to GFP-IQGAP1 in X293T cells  
8 (Figure 3D).

9 Using another anti-ARL4C antibody for the immunocytochemical study (Figure 3-figure  
10 supplement 2A and B), ARL4C and IQGAP1 were shown to accumulate to membrane protrusions at  
11 endogenous level in S2-CP8 and PANC-1 cells under Matrigel-coated 2D culture conditions (Figure  
12 3E; Figure 3-figure supplement 2C). Colocalization of ARL4C and IQGAP1 at membrane  
13 protrusions was observed in 94% of cells with ARL4C accumulation to the protrusions. In 3D culture  
14 conditions, IQGAP1 was found at the tips of membrane protrusions, similar to ARL4C-tdTomato  
15 (Figure 3F). IQGAP1 siRNA inhibited the migratory and invasive abilities in S2-CP8 and PANC-1  
16 cells, and the cells expressing GFP-IQGAP1 expression were resistant to IQGAP1 siRNA (Figure  
17 3G and H; Figure 3-figure supplement 2D).

18 IQGAP1 was highly expressed in 31 of 57 PDAC patients (54%), whereas it was minimally  
19 detected in non-tumor regions of pancreatic ducts (Figure 3I). The anti-IQGAP1 antibody was  
20 validated by Western blotting and immunocytochemical and immunohistochemical analyses (Figure  
21 3-figure supplement 2E-G). Although higher expression of IQGAP1 was not associated with clinical  
22 parameters (Supplementary file 1 Table 3), IQGAP1 expression correlated with decreased overall  
23 survival (Figure 3J). Similar results were obtained from the analysis of TCGA and GTEx datasets  
24 (Figure 3-figure supplement 2H and I). Of 47 PDAC patients with high ARL4C expression, IQGAP1

1 was highly expressed in 27 patients (Figure 3I). Higher expression of ARL4C in the patients positive  
2 for IQGAP1 was associated with perineural invasion (Supplementary file 1 Table 4). The overall  
3 survival of PDAC patients who were double positive for ARL4C and IQGAP1 tended to be worse  
4 (Figure 3-figure supplement 2J).

5 Simultaneous knockdown of ARL4C and IQGAP1 decreased the invasive ability, but the  
6 inhibitory degree was similar to that induced by knockdown of either ARL4C or IQGAP1 (Figure  
7 3K). IQGAP1 knockdown inhibited ARL4C-induced formation of membrane protrusions in BxPC-3  
8 cells cultured under 3D conditions (Figure 3L). Thus, IQGAP1 functions downstream of ARL4C and  
9 they regulate invasion in identical signaling pathways.

10

### 11 **The polybasic region of ARL4C is required for its binding to IQGAP1**

12 ARL4C is modified by myristate at the N terminus and has a polybasic region (PBR), comprising  
13 nine Lys or Arg residues, at the C terminus (Donaldson & Jackson, 2011). ARL4C<sup>G2A</sup>, whose N-  
14 terminal myristoylation site (Gly2) is mutated to Ala, and ARL4C<sup>ΔPBR</sup> were expressed in S2-CP8  
15 cells. In contrast to ARL4C-GFP, ARL4C<sup>G2A</sup>-GFP and ARL4C<sup>ΔPBR</sup>-GFP were not accumulated at  
16 membrane protrusions but distributed throughout the cytosol (Figure 4A and B), and both mutants  
17 severely decreased the binding activity to GFP-IQGAP1 (Figure 4C). The C-terminal region of  
18 KRAS includes the PBR and the CAAX motif, which is farnesylated, and fusion of the KRAS C-  
19 terminal region triggers the localization of the proteins to the cell surface membrane (Hancock et al,  
20 1990). The KRAS C-terminal region was fused to the ARL4C mutants, which were referred to as  
21 ARL4C-GFP-Cterm. Both ARL4C<sup>G2A</sup>-GFP-Cterm and ARL4C<sup>ΔPBR</sup>-GFP-Cterm were localized to  
22 membrane protrusions (Figure 4B). However, although ARL4C<sup>G2A</sup>-FLAG-HA-Cterm formed a  
23 complex with GFP-IQGAP1, ARL4C<sup>ΔPBR</sup>-FLAG-HA-Cterm did not (Figure 4D), suggesting that  
24 membrane localization of ARL4C is not sufficient for its binding to IQGAP1.

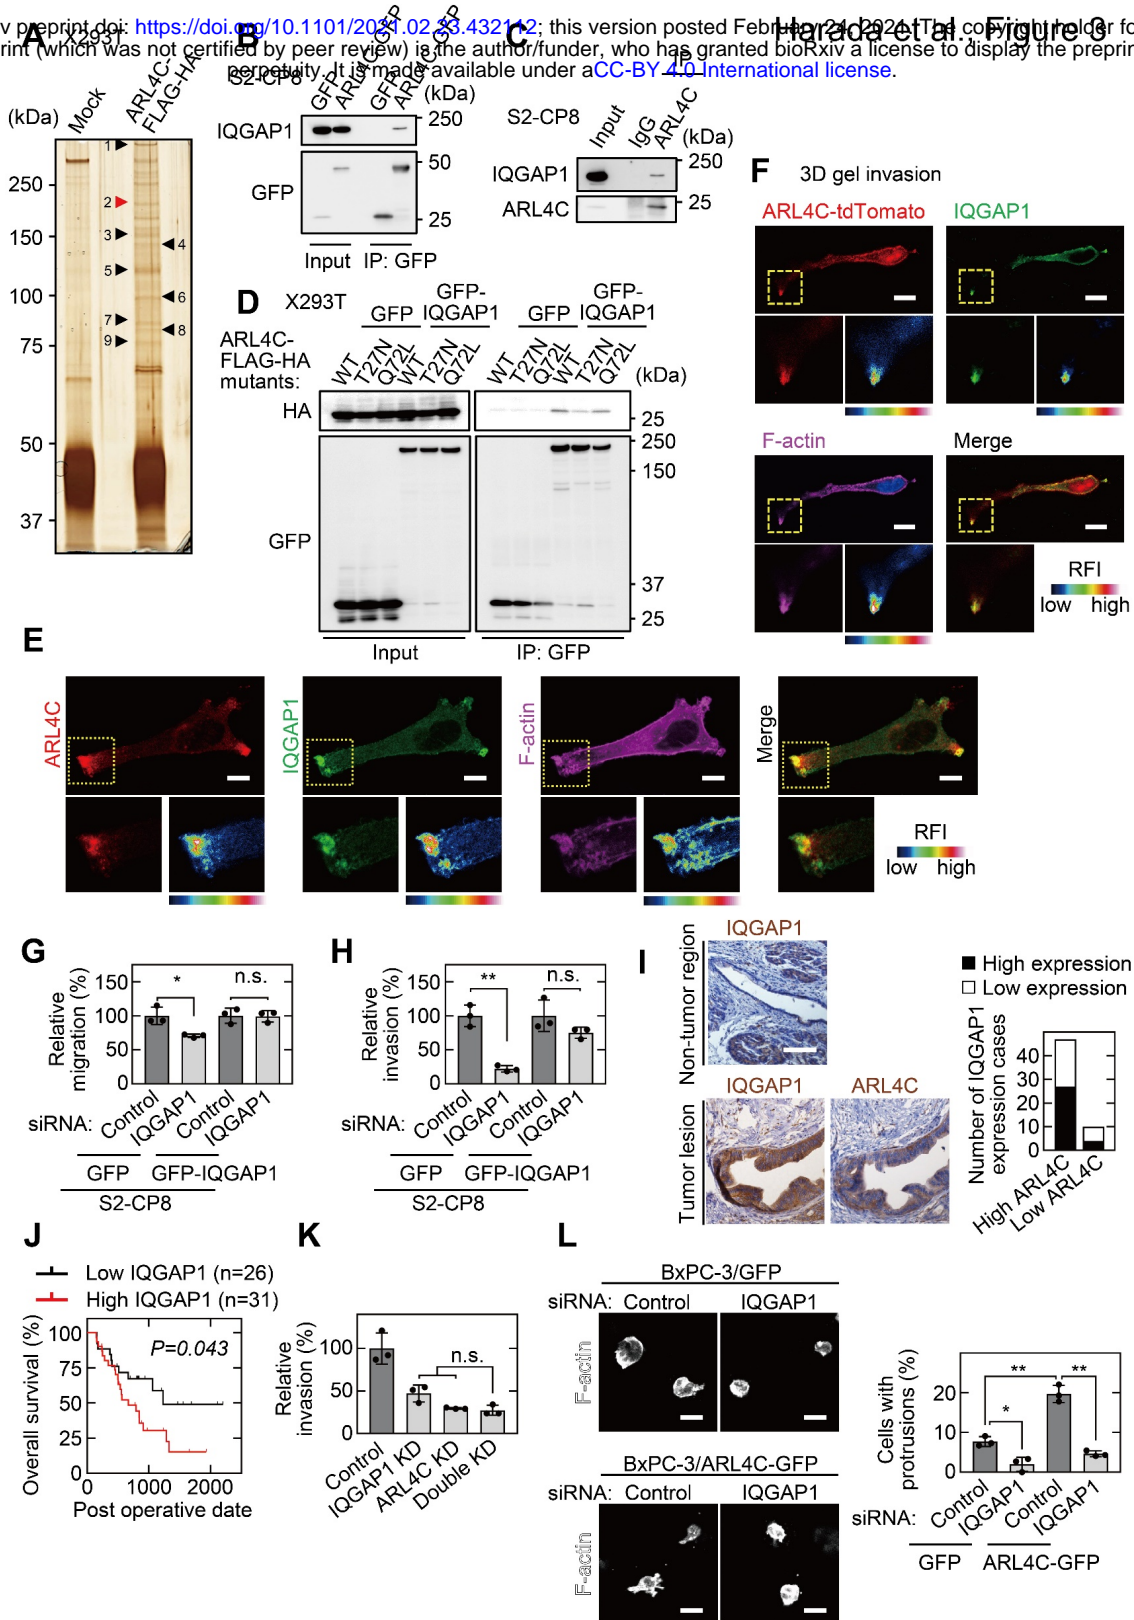

**Figure 3.**  
**IQGAP1 is a novel ARL4C-interacting protein.**

**A**, The ARL4C-interacting proteins in X293T cells were analyzed by mass spectrometry. The results are listed in Table EV2. Arrowheads indicate the identified proteins, including IQGAP1 (red). **B,C**, Lysates of S2-CP8 cells expressing ARL4C-GFP (**B**) or S2-CP8 WT cells (**C**) were immunoprecipitated with anti-GFP antibody (**B**) or anti-ARL4C antibody (**C**), and the immunoprecipitates were probed with the indicated antibodies. **D**, Lysates of X293T cells expressing the indicated proteins were immunoprecipitated with anti-GFP antibody, and the immunoprecipitates were probed with the indicated antibodies. **E**, S2-CP8 cells were stained with the indicated antibodies. Images of ARL4C and IQGAP1 were merged. The regions in the yellow dashed squares are shown enlarged in the left bottom images. The right bottom images are shown with a false color representation of fluorescence intensity. More than 50 cells were imaged and the representative image is shown. **F**, S2-CP8 cells expressing ARL4C-tdTomato were subjected to a 3D collagen I gel invasion assay and were stained with the indicated antibodies. Images of ARL4C and IQGAP1 were merged. Enlarged images of the regions in the yellow dashed squares are shown in a false color representation of fluorescence intensity on the right. **G,H**, S2-CP8 cells expressing GFP or GFP-IQGAP1 were transfected with the indicated siRNAs and subjected to migration (**G**) and invasion (**H**) assays. Migratory and invasive abilities are expressed as the percentage of the same cells transfected with control siRNA. **I**, PDAC tissues were stained with the indicated antibodies and hematoxylin. IQGAP1 expression cases in high or low ARL4C expression lesions are shown. **J**, The relationship between overall survival and IQGAP1 expression in PDAC patients was analyzed. **K**, S2-CP8 cells depleted of the indicated proteins were subjected to an invasion assay. Invasive activities are expressed as the percentage of control cells. **L**, BxPC-3 cells stably expressing GFP or ARL4C-GFP were transfected with the indicated siRNAs and then cultured in 3D collagen I gel. The percentages of cells with protrusions compared with the total number of cells were calculated. **G,H,K,L**, Data are shown as the mean  $\pm$  s.d. of 3 independent experiments. *P* values were calculated using a two-tailed Student's *t*-test (**G,H**) or one-way ANOVA followed by Bonferroni post hoc test (**K,L**). **J**, The data were analyzed by Kaplan-Meier survival curves, and a log-rank test was used for statistical analysis. **E,F**, False color representations were color-coded on the spectrum. Scale bars in **E**, 10  $\mu$ m; **F**, 20  $\mu$ m; **I,L**, 50  $\mu$ m. KD, knockdown. RFI, relative fluorescence intensity. n.s., not significant. \*, *P* < 0.05; \*\*, *P* < 0.01. See Figure 3-source data 1.

1 The localization of IQGAP1 to membrane protrusions was lost in ARL4C knock out (KO) cells  
2 but not vice versa (Figure 4E and F). In ARL4C KO cells, ARL4C-GFP and ARL4C<sup>G2A</sup>-GFP-Cterm  
3 rescued the recruitment of IQGAP1 to the plasma membrane, unlike ARL4C<sup>G2A</sup>-GFP, ARL4C<sup>ΔPBR</sup>-  
4 GFP, and ARL4C<sup>ΔPBR</sup>-GFP-Cterm (Figure 4E). Therefore, for IQGAP1 to be recruited to membrane  
5 protrusions, the localization of ARL4C to the plasma membrane through the PBR might be  
6 necessary. In addition, ARL4C ASO-1316 inhibition of invasive ability was cancelled by expression  
7 of ARL4C<sup>G2A</sup>-GFP-Cterm but not by that of ARL4C<sup>G2A</sup>-GFP, ARL4C<sup>ΔPBR</sup>-GFP, or ARL4C<sup>ΔPBR</sup>-GFP-  
8 Cterm (Figure 4G; Figure 4-figure supplement 1A). Thus, the binding of ARL4C and IQGAP1 in  
9 membrane protrusions could be essential for the invasive ability.

10

#### 11 **ARL4C recruits IQGAP1 to membrane protrusions in a PI(3,4,5)P3-dependent manner**

12 PI(4,5)P2 (PIP2) and PI(3,4,5)P3 (PIP3) are required for ARL4C membrane targeting(Heo et al,  
13 2006). The pleckstrin homology (PH) domain functions as a protein- and phospholipid-binding  
14 structural protein module(Maffucci & Falasca, 2001). The PH domains of PLC $\delta$  and GRP1 prefer to  
15 bind to PIP2 and PIP3, respectively(Lemmon, 2008). GFP-PLC $\delta$ <sup>PH</sup> was detected throughout the cell  
16 surface membrane, whereas GFP-GRP1<sup>PH</sup> was accumulated in membrane protrusions (Figure 5A).

17 The levels of PIP2 and PIP3 in the plasma membrane were decreased by a rapamycin-inducible  
18 PIP2-specific phosphatase (Inp54p)(Suh et al, 2006) and a PI3 kinase inhibitor LY294002(Petrie et  
19 al, 2012), respectively. PIP3 depletion decreased the membrane targeting of ARL4C and IQGAP1  
20 and reduced the invasive ability, but PIP2 depletion did not (Figure 5B and C). IQGAP1 and  
21 ARL4C-mCherry colocalized with GRP1<sup>PH</sup> in membrane protrusions (Figure 5D), suggesting that  
22 both proteins accumulate in the cell peripheral regions containing PIP3 and promote invasion.

23 To reveal the importance of PIP3 for the localization area of ARL4C and IQGAP1, PLC $\delta$ <sup>PH</sup> or  
24 GRP1<sup>PH</sup> was fused to the C terminus of ARL4C<sup>G2A</sup>-GFP (Figure 5E). While both ARL4C<sup>G2A</sup>-GFP-  
25 GRP1<sup>PH</sup> and ARL4C<sup>G2A</sup>-GFP-PLC $\delta$ <sup>PH</sup> formed a complex with GFP-IQGAP1, the former construct  
26 was localized to membrane protrusions, but the latter construct was present throughout the cell



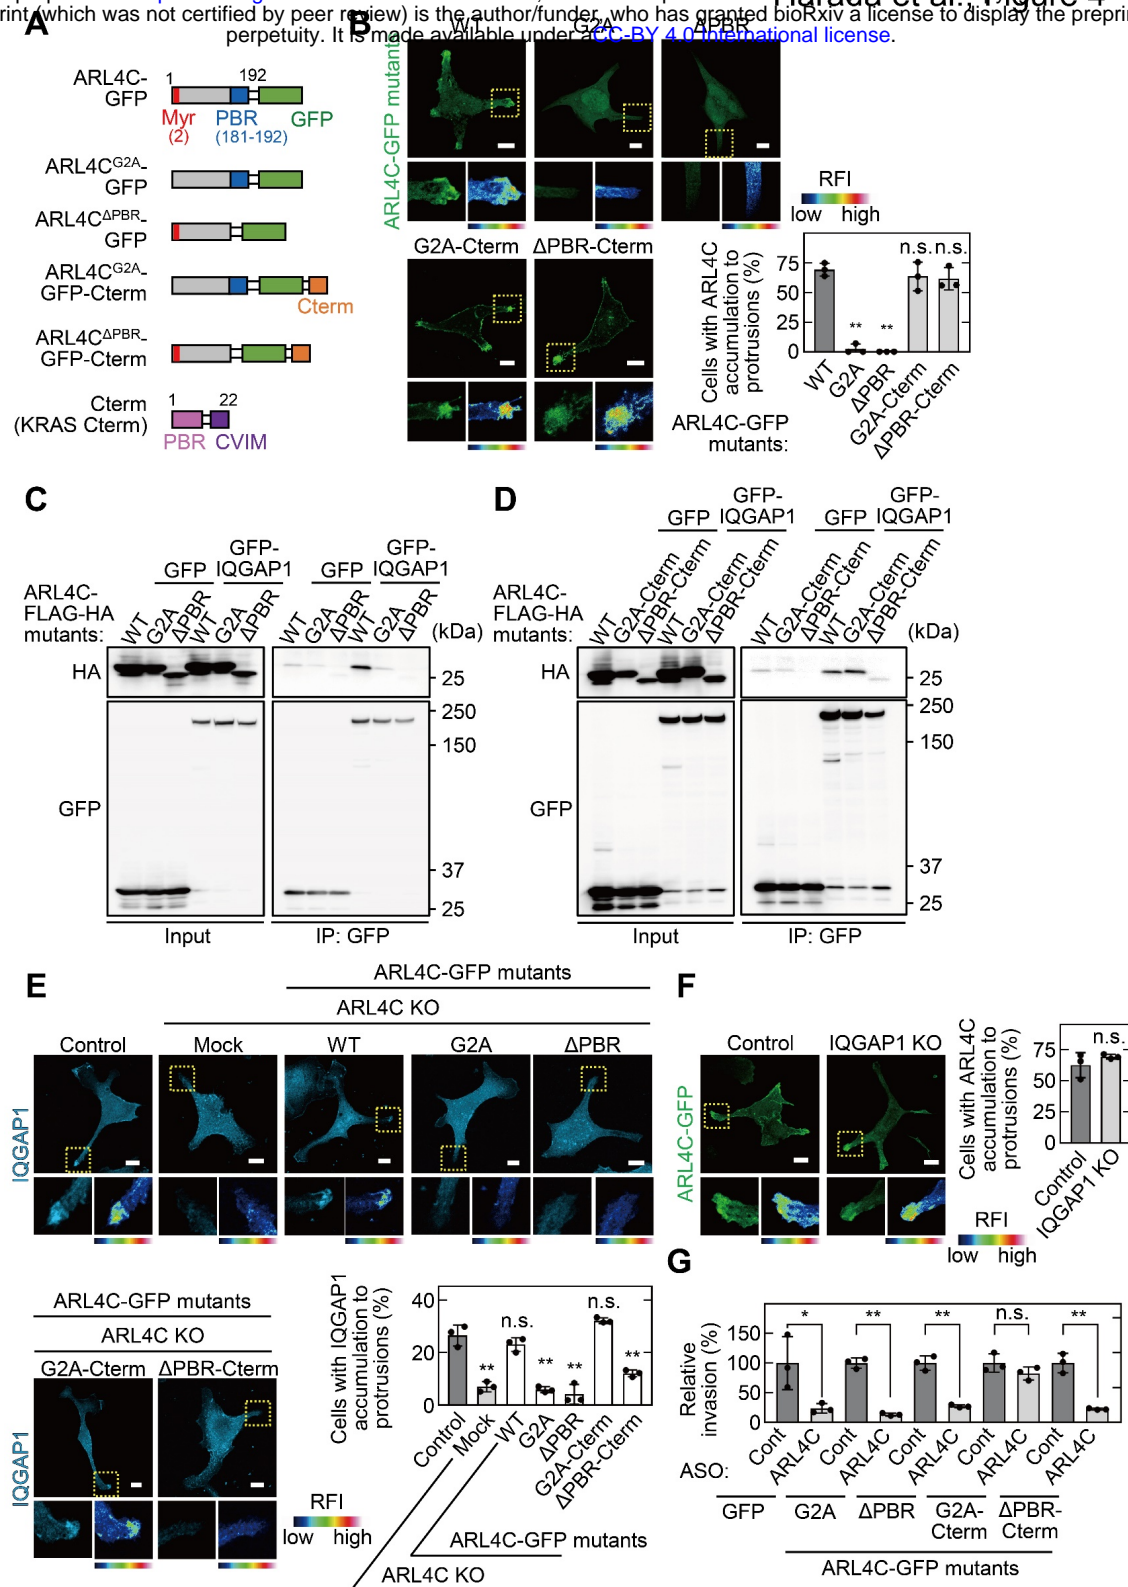

**Figure 4.**

**The PBR of ARL4C is required for ARL4C and IQGAP1 binding.**

**A**, A schematic representation of four ARL4C-GFP mutants is shown. **B**, S2-CP8 cells were transfected with the indicated mutants of ARL4C-GFP. The percentages of cells with ARL4C-GFP mutant accumulated at membrane protrusions compared with the total number of cells were calculated. **C,D**, Lysates of X293T cells expressing the indicated proteins were immunoprecipitated with anti-GFP antibody and the immunoprecipitates were probed with anti-HA and anti-GFP antibodies. **E**, S2-CP8 WT or ARL4C KO cells transfected with control or the indicated mutants of ARL4C-GFP were stained with anti-IQGAP1 antibody. The percentages of cells with IQGAP1 accumulated at membrane protrusions compared with the total number of cells were calculated. **F**, S2-CP8 WT or IQGAP1 KO cells were transfected with ARL4C-GFP. The percentages of cells with ARL4C-GFP accumulated at membrane protrusions compared with the total number of cells were calculated. **G**, S2-CP8 cells stably expressing GFP or the indicated mutants of ARL4C-GFP were transfected with control or ARL4C ASO and subjected to invasion assays. Invasive ability is expressed as the percentage of the same cells transfected with control ASO. **B,E-G**, Data are shown as the mean  $\pm$  s.d. of 3 independent experiments. *P* values were calculated using a two-tailed Student's *t*-test (**F,G**) or one-way ANOVA followed by Bonferroni post hoc test (**B,E**). **B,E,F**, The regions in the yellow dashed squares are shown enlarged in the left bottom images. The right bottom images are shown in a false color representation of fluorescence intensity. False color representations were color-coded on the spectrum. Scale bars in **B,E,F**, 10  $\mu$ m. KO, knockout. RFI, relative fluorescence intensity. n.s., not significant. \*, *P* < 0.05; \*\*, *P* < 0.01. See Figure 4-source data 1.

1 surface membrane (Figure 5F; Figure 5-figure supplement 1A). Consistently, in ARL4C KO cells,  
2 the localization of IQGAP1 to membrane protrusions was rescued by ARL4C<sup>G2A</sup>-GFP-GRP1<sup>PH</sup> but  
3 not by ARL4C<sup>G2A</sup>-GFP-PLC $\delta$ <sup>PH</sup> (Figure 5G). Furthermore, ARL4C ASO-1316 inhibited the invasive  
4 ability of S2-CP8 cells expressing ARL4C<sup>G2A</sup>-GFP-PLC $\delta$ <sup>PH</sup> but not those expressing ARL4C<sup>G2A</sup>-  
5 GFP-GRP1<sup>PH</sup> (Figure 5H; Figure 5-figure supplement 1B). Taken together, these results suggest that  
6 PIP3-dependent membrane targeting of ARL4C recruits IQGAP1 to membrane protrusions and  
7 promotes invasion.

8

9 **ARL4C is involved in the focal delivery of MMP14 to membrane protrusions through IQGAP1**  
10 IQGAP1 is involved in the trafficking of MMP14-containing vesicles to invasive protrusions of  
11 cancer cells (Sakurai-Yageta et al, 2008). TCGA dataset showed that expression of *MMP14* mRNA in  
12 pancreatic cancer patients is positively correlated with that of both *ARL4C* and *IQGAP1* mRNA  
13 (Figure 6-figure supplement 1A). In addition, MMP14 expression was associated with poor  
14 prognosis (Figure 6-figure supplement 1B).

15 Cell surface MMP14-GFP accumulated in membrane protrusions containing IQGAP1 and  
16 ARL4C-FLAG-HA (Figure 6A). MMP14-GFP disappeared from the membrane protrusions of  
17 ARL4C KO and IQGAP KO cells and the phenotype was rescued by expression of ARL4C-FLAG-  
18 HA and FLAG-HA-IQGAP1 (Figure 6B and C). The failure of MMP14 membrane targeting in  
19 ARL4C KO cells was rescued by expression of ARL4C<sup>G2A</sup>-FLAG-HA-Cterm but not by that of  
20 ARL4C<sup>G2A</sup>-FLAG-HA, ARL4C <sup>$\Delta$ PBR</sup>-FLAG-HA, or ARL4C <sup>$\Delta$ PBR</sup>-FLAG-HA-Cterm (Figure 6B). In  
21 addition, PIP3 depletion, but not PIP2 depletion, suppressed the membrane localization of MMP14  
22 (Figure 6D). Therefore, in co-operation with ARL4C and IQGAP1, MMP14 is likely to be trafficked  
23 to membrane protrusions with PIP3 accumulation.

24 Consistent with these results, the inhibited invasive ability after double knockdown of ARL4C  
25 and MMP14 or IQGAP1 and MMP14 by siRNA was similar to that seen after single knockdown of  
26 ARL4C, IQGAP1, or MMP14 (Figure 6E; Figure 6-figure supplement 1C and D). Knockdown of

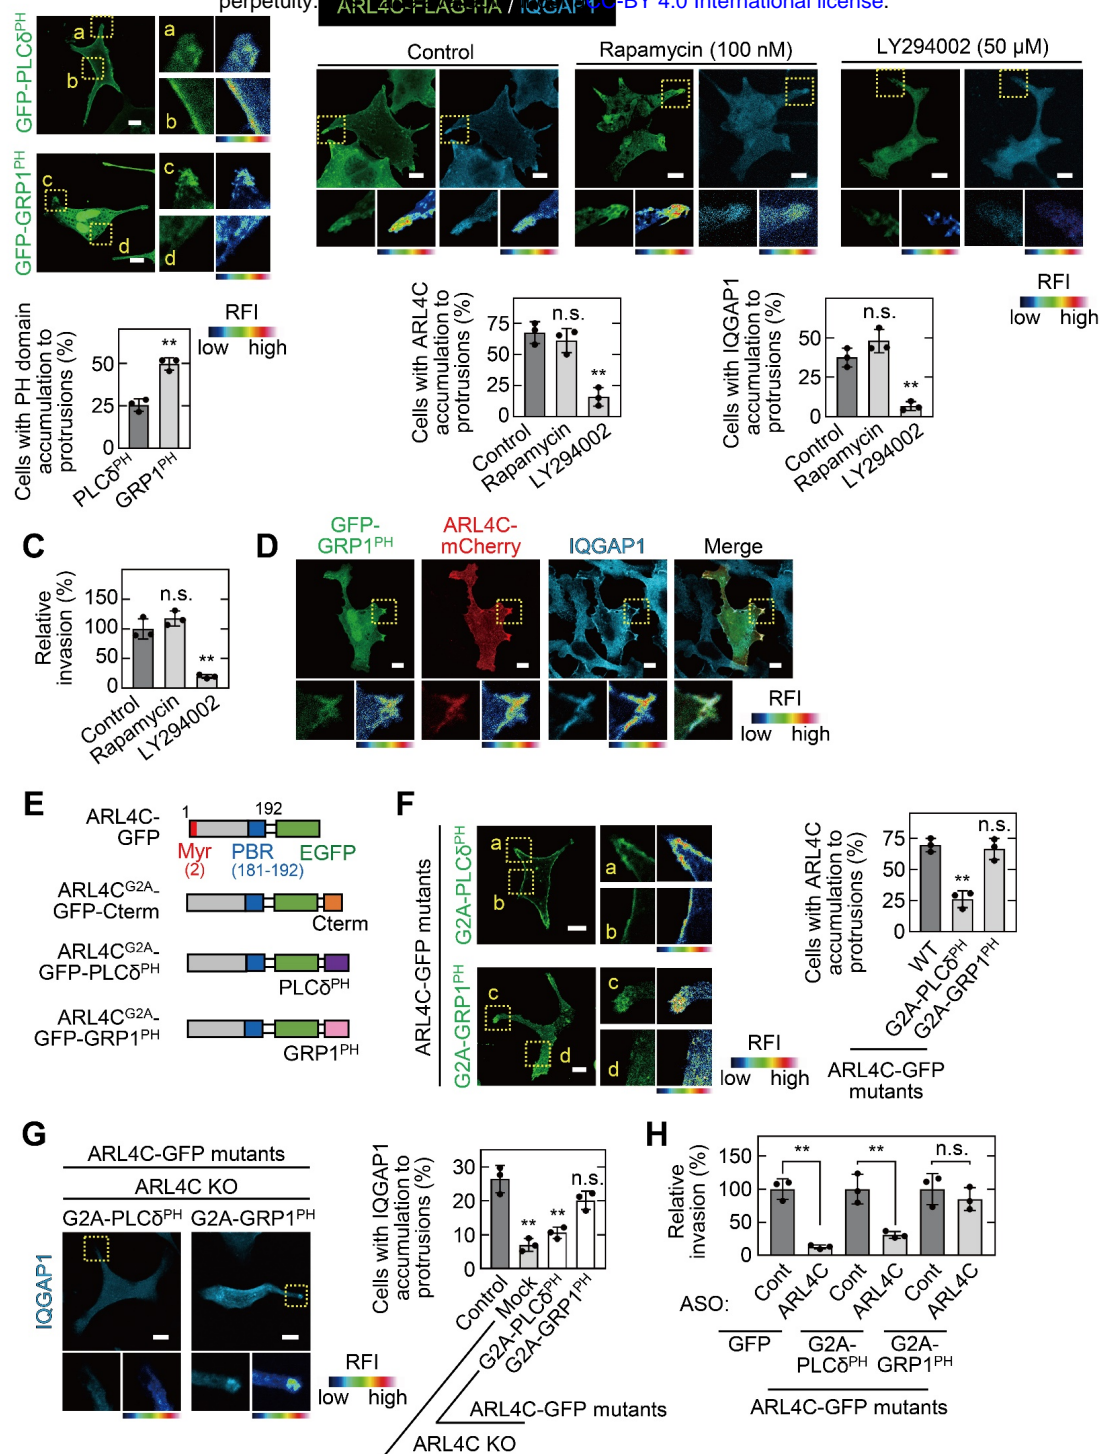

**Figure 5.**

**ARL4C recruits IQGAP1 to membrane protrusions in a PIP3-dependent manner.**

**A**, S2-CP8 cells were transfected with GFP-PLCδ<sup>PH</sup> or GFP-GRP1<sup>PH</sup>. The percentages of cells with GFP-PLCδ<sup>PH</sup> or GFP-GRP1<sup>PH</sup> accumulated at membrane protrusions compared with the total number of cells were calculated. **B**, S2-CP8 cells expressing FRB-CFP, mRFP-FKBP-5-ptase domain, and ARL4C-FLAG-HA were treated with or without rapamycin or LY294002 and stained with anti-HA and anti-IQGAP1 antibodies. The percentages of cells with IQGAP1 or ARL4C-FLAG-HA accumulated at membrane protrusions compared with the total number of cells were calculated. **C**, S2-CP8 cells expressing FRB-CFP and mRFP-FKBP-5-ptase domain were treated with or without rapamycin or LY294002 and subjected to an invasion assay. Invasive activities are expressed as the percentage of control cells. **D**, S2-CP8 cells expressing ARL4C-mCherry and GFP-GRP1<sup>PH</sup> were stained with anti-IQGAP1 antibody. Images of GFP-GRP1<sup>PH</sup>, ARL4C-mCherry, and IQGAP1 were merged. **E**, A schematic representation of ARL4C-GFP mutants is shown. **F**, S2-CP8 cells were transfected with the indicated mutants of ARL4C-GFP. The percentages of cells with ARL4C-GFP mutant accumulated at membrane protrusions compared with the total number of cells were calculated. **G**, ARL4C KO cells expressing control or the indicated mutants of ARL4C-GFP were stained with anti-IQGAP1 antibody. Quantification was performed as in **(B)**. **H**, S2-CP8 cells stably expressing GFP or the indicated mutants of ARL4C-GFP were transfected with control or ARL4C ASO and subjected to an invasion assay. Invasive ability is expressed as the percentage of the same cells transfected with control ASO. **A, F**, Enlarged images of the regions in the yellow dashed squares and a false color representation of fluorescence intensity are shown on the right. (a) and (c) show the protrusion, and (b) and (d) show the cell body. **B, D, G**, The regions in the yellow dashed squares are shown enlarged in the left bottom images. The right bottom images are shown in a false color representation of fluorescence intensity. **A-C, F-H**, Data are shown as the mean ± s.d. of 3 independent experiments. *P* values were calculated using a two-tailed Student's *t*-test (**A, H**) or one-way ANOVA followed by Bonferroni post hoc test (**B, C, F, G**). **A, B, D, F, G**, False color representations were color-coded on the spectrum. Scale bars in **A, B, D, F, G**, 10 μm. KO, knockout. RFI, relative fluorescence intensity. n.s., not significant. \*\*, *P* < 0.01. See Figure 5-source data 1.

1 ARL4C, IQGAP1, or MMP14 also decreased invasive ability in 3D microfluidic cell culture (Figure  
2 6F) and the collagenase activity was also reduced (Figure 6G). Previous work has shown that  
3 MMP14<sup>ΔC</sup>(Δ563–582) lacking the cytoplasmic region fails to be endocytosed(Jiang et al, 2001).  
4 Here, MMP14<sup>ΔC</sup> was retained in membrane protrusions of ARL4C-depleted cells (Figure 6-figure  
5 supplement 1E), and the ARL4C knockdown-mediated decreases in cell invasion and collagen  
6 degradation were rescued by MMP14<sup>ΔC</sup> (Figure 6H; Figure 6-figure supplement 1F and G). Thus,  
7 ARL4C-dependent recruitment of MMP14 to membrane protrusions is required for cell invasion.

8 MMP14 was detected in similar lesions to ARL4C and IQGAP1 in serial PDAC specimens  
9 (Figure 6-figure supplement 1H). Notably, a group of cells invaded the surrounding interstitial  
10 tissues, and concurrently expressed ARL4C, IQGAP1, and MMP14 (Figure 6I; Figure 6-figure  
11 supplement 1H). Taken together, these results support the idea that the ARL4C–IQGAP1–MMP14  
12 signaling axis participates in pancreatic cancer cell invasion.

13

#### 14 **ARL4C ASO inhibits pancreatic tumor metastasis *in vivo***

15 To show that ARL4C is indeed involved in cancer cell invasion *in vivo*, the effects of subcutaneous  
16 injection of ARL4C ASO-1316 on an orthotopic transplantation model was tested. S2-CP8 cells  
17 expressing luciferase were injected into the pancreas of nude mice, and control ASO or ARL4C ASO-  
18 1316 was subcutaneously injected from day 3 (Figure 7A). After 2 and 3 weeks, ARL4C ASO-1316  
19 suppressed the luminescence signal compared with control ASO (Figure 7B). Whereas ARL4C ASO-  
20 1316 did not reduce the size of the primary tumor in the pancreas, the ASO decreased the numbers of  
21 lymph node metastases and tended to improve the survival (Figure 7C and D; Figure 7-figure  
22 supplement 1A).

23 When 6-FAM–labeled ARL4C ASO-1316 was subcutaneously injected into tumor-bearing  
24 mice, the fluorescence was specifically detected in the pancreas (Figure 7E). 6-FAM–labeled ARL4C  
25 ASO-1316 was highly accumulated in tumor lesions but not in the neighboring normal tissues  
26 (Figure 7F), indicating that ASO was incorporated into tumor lesions after systemic injection. In



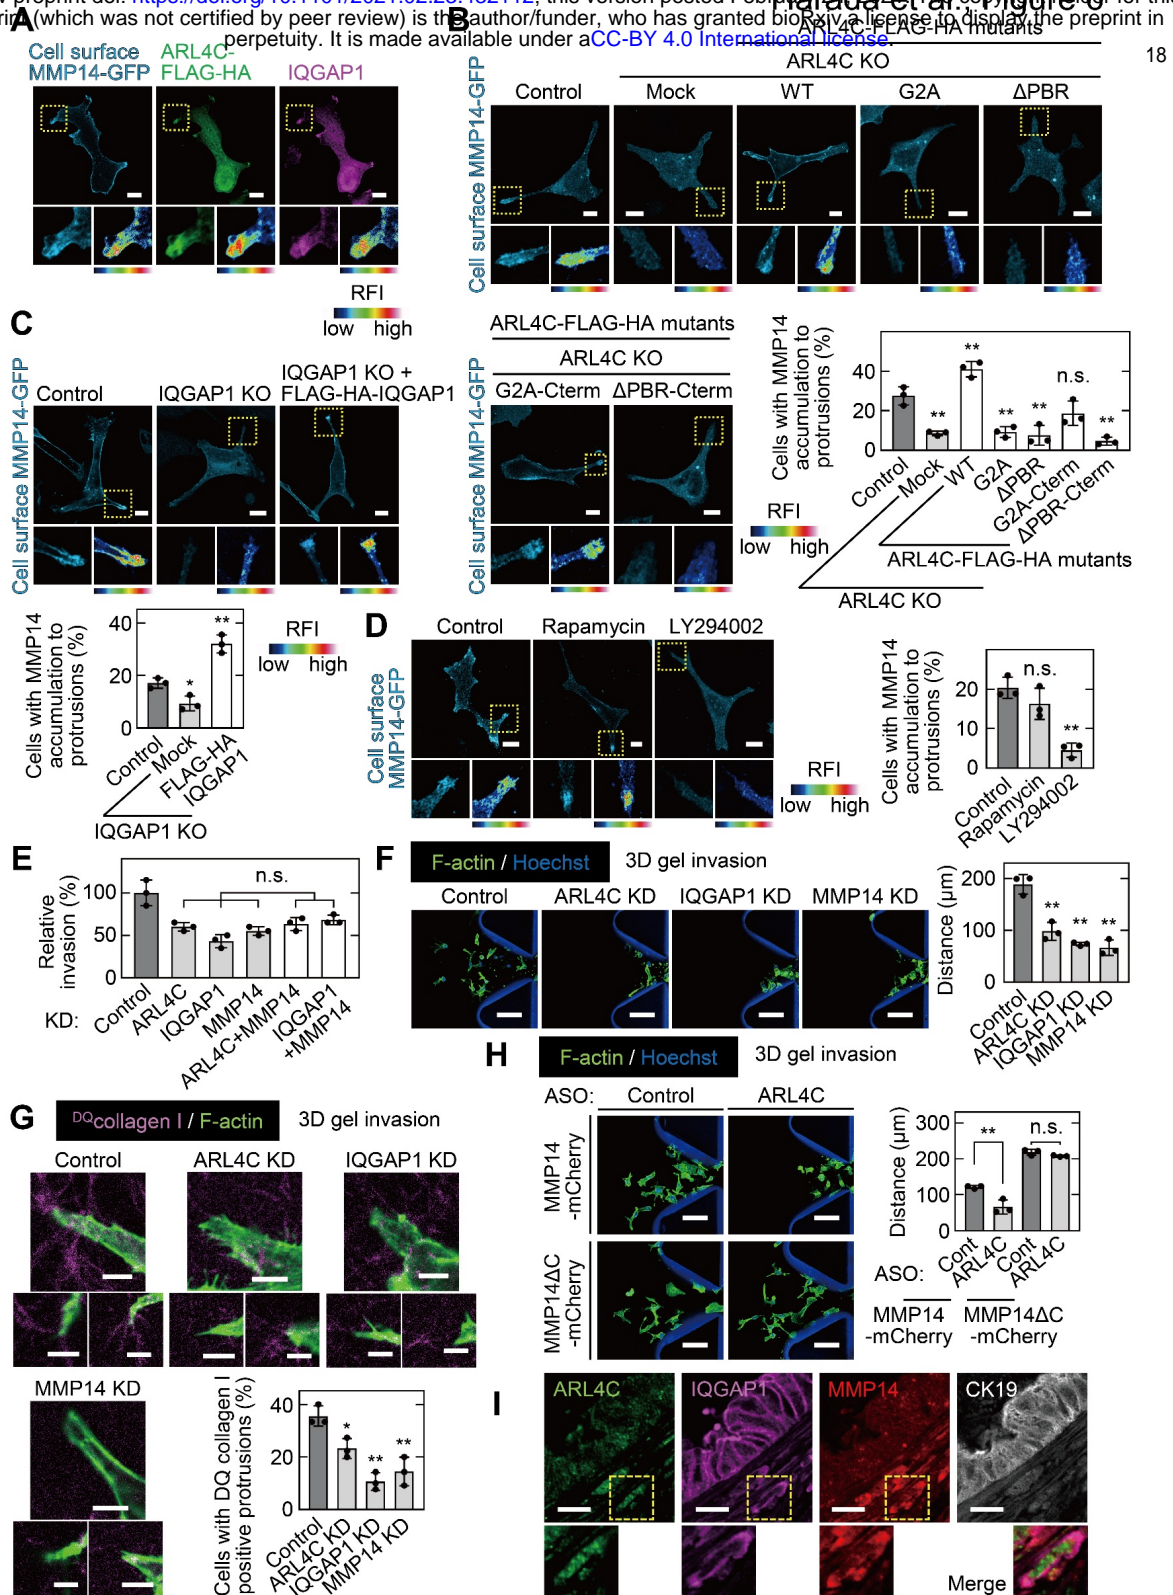



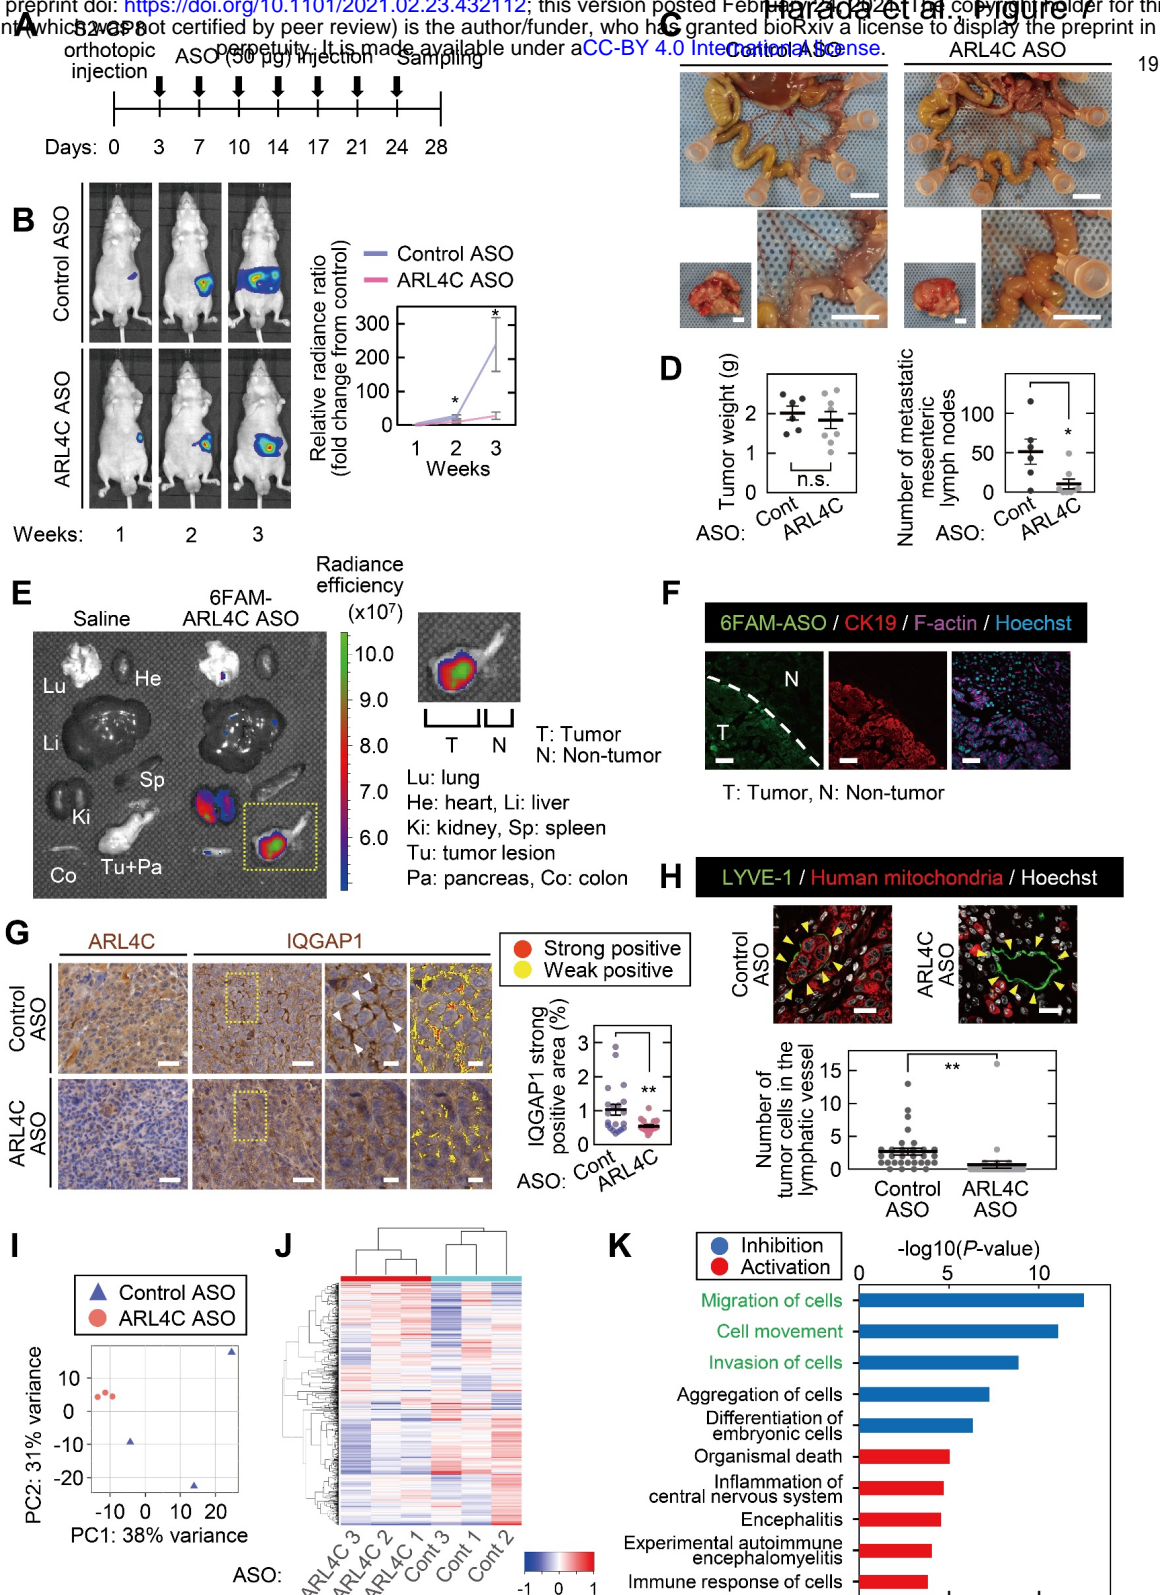

**Figure 7.**  
**ARL4C ASO inhibits pancreatic tumor invasion *in vivo*.**

A, S2-CP8/Luciferase cells were implanted into the pancreas of nude mice, and control ASO (n = 6) or ARL4C ASO-1316 (n = 7) was subcutaneously administered. B, Bioluminescence images of the intraperitoneal tumors are presented (left) and quantification of the tumor burden is shown (right). The data are presented as the mean ± s.e.m. of the fold change in luminescent intensity relative to that of week 1 treated with control ASO. C, Representative images of the tumors in the pancreas (left bottom) and metastatic mesenteric lymph nodes (top and right bottom) are shown. D, Primary tumor weight (left) and metastatic mesenteric lymph node number are presented (right). Data are shown as the mean ± s.e.m. E, F, 4 h after subcutaneous injection of 6-FAM-ARL4C ASO-1316 into tumor-bearing mice, the fluorescence intensities of various organs were measured (E), and the sections prepared from the pancreas were stained with the indicated antibodies (F). Area indicated by yellow dashed square is enlarged on the right panel (E). G, Sections from the pancreatic tumor were stained with the indicated antibodies and hematoxylin. The two panels on the right show enlarged images of the yellow dashed squares. Positive staining of IQGAP1 is color-coded as yellow (weakly positive) or red (strongly positive). The percentage of the strongly positive IQGAP1 area was calculated. Data are shown as the mean ± s.e.m. Twenty fields were analyzed from 3 mice per group. H, Sections from the pancreatic tumor were stained with the indicated antibodies. The numbers of tumor cells in the lymphatic vessels (indicated with arrowheads) were counted. Data are shown as the mean ± s.e.m. Thirty lymphatic vessels were analyzed from 3 mice per group. I, J, RNA sequencing was performed for S2-CP8-derived primary tumors, and the results of principal component analysis (I) and hierarchical clustering (J) are shown. K, Differentially expressed genes were subjected to Ingenuity Pathway Analysis (IPA). The top five disease or function annotations of the positive and negative Z-score groups are shown. Bars indicate the -log<sub>10</sub>(P value). Inhibited pathways are represented by blue-colored bars while activated pathways are shown by red-colored bars. B, D, G, H, P values were calculated using a two-tailed Student's t-test. Scale bars in C, 5 mm; F, G, 50 µm; H, 20 µm. n.s., not significant. \*, P < 0.05; \*\*, P < 0.01. See Figure 7-source data 1.

1 primary pancreatic tumors, ARL4C ASO-1316 reduced ARL4C expression and decreased the  
2 localization of IQGAP1 to the cell surface area (Figure 7G; Figure 7-figure supplement 1B). Tumor  
3 cells were observed in lymphatic vessels of peritumoral areas of control ASO-treated mice but not in  
4 those of ARL4C ASO-treated mice (Figure 7H).

5 To compare molecular characteristics between pancreatic tumors from mice injected with  
6 control ASO and ARL4C ASO-1316, RNA sequence analysis was performed for primary tumors.  
7 Principal component analysis (PCA) indicated a clear difference in the gene expression profiles of  
8 tumors from control ASO- and ARL4C ASO-1316-treated mice (Figure 7I). Furthermore,  
9 hierarchical clustering revealed a drastic change in expression of genes due to ARL4C ASO-1316  
10 injection (Figure 7J). Two hundred and three differentially expressed genes (DEGs) were detected,  
11 and by subjecting them to Ingenuity Pathway Analysis (IPA), the top 5 significantly enriched terms  
12 of the biological process of molecular function in the inhibition and activation of the pathways were  
13 obtained (Figure 7K). In particular, DEGs linked to the inhibition of the pathways in ARL4C ASO-  
14 1316-treated mice were predicted to be involved in terms such as cell migration and invasion (Figure  
15 7K). Taken together, these results suggest that ARL4C ASO inhibits the invasion of tumor cells into  
16 lymphatic vessels *in vivo*, and the gene profiles of tumors treated with ARL4C ASO *in vivo* support  
17 the putative functions of ARL4C in pancreatic cancer invasion.

18

## 19 **Discussion**

20 Pancreatic cancer represents one of the leading causes of cancer death, despite advances in cancer  
21 therapy(Keleg et al, 2003). Major problem of pancreatic cancer is uncontrollable invasion and  
22 metastasis. In this study, we found that the ARL4C–IQGAP1–MMP14 signaling axis is involved in  
23 pancreatic cancer invasion. Because ARL4C expression is induced by Wnt and EGF signaling, it is  
24 reasonable that ARL4C would be expressed in a  $\beta$ -catenin– and RAS-dependent manner in  
25 pancreatic cancer cells. ARL4C is a unique small G protein because it is constitutively active,  
26 regardless of wild-type(Burd et al, 2004; Matsumoto et al, 2017). The long interswitch region of

1 ARL4C may prevent the retractile conformation change in the GDP-bound state(Burd et al, 2004;  
2 Pasqualato et al, 2002). ARL4C could be a constitutively active form without active mutations, and  
3 its activity may be controlled by transcriptional regulation.

4 ARL4C binds to cytohesin2(Hofmann et al, 2007), leading to activation of ARF6–RAC–RHO–  
5 YAP/TAZ signaling in colon and lung cancer cells(Fujii et al, 2015; Kimura et al, 2020). Because  
6 ARL4C did not bind to cytohesin2 but to IQGAP1 in pancreatic cancer cells, it is likely that ARL4C  
7 regulates different downstream signaling pathways in a cancer cell context-dependent manner.  
8 Invadopodia are the unique structures observed at the ventral sites of certain types of cancer  
9 cells(Dalaka et al, 2020; Murphy & Courtneidge, 2011). However, in S2-CP8 and PANC-1 cells  
10 highly expressing ARL4C, invadopodia were not formed and ARL4C was observed in membrane  
11 protrusions. Because both structures are formed by similar molecules, including IQGAP1 and  
12 MMP14(Caswell & Zech, 2018; Jacquemet et al, 2013), ARL4C may determine the delivery of  
13 signaling components and cellular machineries to the cell peripheral membrane.

14 Both myristoylation and the PBR of ARL4C support plasma membrane targeting(Heo et al,  
15 2006). In our results, both motifs were necessary for the localization of ARL4C to the plasma  
16 membrane, whereas the PBR, rather than myristoylation, was indispensable for the activity of the  
17 ARL4C–IQGAP1–MMP14 signaling axis. Phosphoinositides have been implicated in many aspects  
18 of cell physiology(Di Paolo & De Camilli, 2006). PIP3 is localized to the leading edge of migrating  
19 cells and invadopodia of cancer cells(Saykali & El-Sibai, 2014) and recruits cytosolic proteins  
20 containing lipid-binding domains, such as the PH domain, to the plasma membrane(Toker & Cantley,  
21 1997). ARL4C in pancreatic cancer cells preferred PIP3 to PIP2. Because PI3 kinase is one of the  
22 direct effector proteins of RAS(Castellano & Downward, 2011; Rodriguez-Viciano et al, 1994),  
23 RAS-dependent PI3 kinase activation and ARL4C expression could co-operatively function to  
24 promote pancreatic cancer invasion.

25 In conclusion, this study clarified that invasion of pancreatic cancer cells is promoted by ARL4C,  
26 which is induced by KRAS and Wnt signaling, and association of ARL4C with IQGAP1 and MMP14

1 at the membrane protrusion is essential for the invasive ability. The novel functions of ARL4C were  
2 confirmed by the mouse model. The inhibition of ARL4C expression by ARL4C ASO could directly  
3 inhibit invasion ability of pancreatic cancer cells and may indirectly affect the genes involved in  
4 invasion perhaps through the interaction between tumors and surrounding tissues. Because histological  
5 damage to the non-tumor regions was not observed after the administration of ARL4C ASO-  
6 1316(Harada et al, 2019), ARL4C might represent an appropriate target for pancreatic cancer therapy.

## 1 **Materials and Methods**

2

### 3 **Materials and chemicals**

4 HeLaS3 cells were kindly provided by Dr. K. Matsumoto (Nagoya University, Aichi, Japan) in May  
5 2002. S2-CP8 pancreatic cancer cells were purchased from Cell Resource Center for Biomedical  
6 Research, Institute of Development, Aging and Cancer, Tohoku University, in April 2014. Lenti-X™  
7 293T (X293T) cells were purchased from Takara Bio Inc. (Shiga, Japan) in October 2011. PANC-1  
8 cells were purchased from RIKEN Bioresource Center Cell Bank (Tsukuba, Japan) in October 2014.  
9 BxPC-3 cells were purchased from American Type Culture Collection in May 2018. HPAF-II cells  
10 were purchased from American Type Culture Collection in July 2017. S2-CP8, X293T, HeLaS3,  
11 Capan-2, Aspc-1, HPAF-II, and MDA-MB-231 cells were grown in Dulbecco's modified Eagle's  
12 medium (DMEM) supplemented with 10% fetal bovine serum (FBS). PANC-1 and BxPC-3 cells  
13 were grown in RPMI-1640 supplemented with 10% FBS.

14 S2-CP8 cells stably expressing GFP, ARL4C-EGFP, ARL4C<sup>G2A</sup>-EGFP, ARL4C<sup>T27N</sup>-EGFP,  
15 ARL4C<sup>Q72L</sup>-EGFP, ARL4C<sup>ΔPBR</sup>-EGFP, ARL4C<sup>G2A</sup>-EGFP-Cterm, ARL4C<sup>ΔPBR</sup>-EGFP-Cterm,  
16 ARL4C<sup>G2A</sup>-EGFP-GRP1<sup>PH</sup>, ARL4C<sup>G2A</sup>-EGFP-PLCδ<sup>PH</sup>, ARL4C-mCherry, ARL4C-tdTomato, EGFP-  
17 IQGAP1, and luciferase were generated using lentivirus as described previously (Kimura et al,  
18 2016). BxPC-3 cells stably expressing EGFP or ARL4C-EGFP were generated using lentivirus.  
19 Lentiviral vector CSII-CMV-MCS-IRES2-Bsd harboring a cDNA was transfected with the  
20 packaging vectors pCAG-HIV-gp and pCMV-VSV-G-RSV-Rev into X293T cells using  
21 Lipofectamine2000 transfection reagent (Life Technologies/Thermo Fisher Scientific, Carlsbad, CA,  
22 USA). To generate S2-CP8 stable cells above, 1 x 10<sup>5</sup> parental cells/well in a 12-well plate were  
23 treated with lentiviruses and 5 μg/mL polybrene, centrifuged at 1200 x g for 30 min, and incubated  
24 for 24 h. The cells were selected and maintained in the medium containing 10 μg/mL Blastcidin S.

25 ARL4C or IQGAP1 knockout cells were generated as previously described (Fujii et al, 2016). The  
26 target sequences for human ARL4C, 5'-CTTCTCGGTGTTGAAGCCGA-3', and human IQGAP1,



1 5'-CACCGTGGGGTCTACCTTGCCAAAC-3' were designed with the help of the CRISPR Genome  
2 Engineering Resources (<http://www.genome-engineering.org/crispr/>). The plasmids expressing  
3 hCas9 and single-guide RNA (sgRNA) were prepared by ligating oligonucleotides into the BbsI site  
4 of pX330 (addgene #42230). The plasmid pX330 with sgRNA sequences targeting ARL4C, IQGAP1  
5 and Blastidicin resistance was introduced into S2-CP8 cells using Lipofectamine LTX reagent (Life  
6 Technologies/Thermo Fisher Scientific) according to manufacturer's instructions and the transfected  
7 cells were selected in medium containing 5 µg/mL Blastidicin S for two days. Single colonies were  
8 picked, mechanically disaggregated, and replated into individual wells of 24-well plates.

9 ARL4C ASO-1316 and 6-carboxyfluorescein (FAM)-labelled ARL4C ASO-1316 were synthesized  
10 by GeneDesign (Osaka, Japan) as described(Harada et al, 2019). The sequences of the ASOs are  
11 listed in Supplementary file 1 Table 5. S2-CP8 cell were transfected with ASOs at 10 nmol/L using  
12 RNAiMAX (Life Technologies/Thermo Fisher Scientific) in antibiotics-free medium. The  
13 transfected cells were then used for experiments conducted at 48 h after transfection.

14 Anti-ARL4C polyclonal antibody (SAJ5550275) for immunoprecipitation and  
15 immunocytochemistry was generated in rabbits by immunization with recombinant human ARL4C.  
16 Antibodies used in this study are shown in Supplementary file 1 Table 6.

17 The following drugs were used: PD184161 (Sigma-Aldrich Co, St. Louis, MO, USA); U0126  
18 (Promega Corp., Madison, WI, USA); Rapamycin (Cell Signaling Technology, Beverly, MA, USA);  
19 LY294002 (Cell Signaling Technology); and VivoGlo luciferin (Promega Corp.).

20

## 21 **Plasmid construction**

22 pEGFPC2-IQGAP1, pEGFP-mCytH2, pAcGFP-mPlcd1<sup>PH</sup>, and CSII-CMV-MCS-IRES2-Bsd were  
23 kindly provided by K. Kaibuchi (Nagoya University, Japan), J. Yamauchi (Tokyo University of  
24 Pharmacy and Life Science, Japan), M. Matsuda (Kyoto University, Kyoto, Japan), and H. Miyoshi  
25 (RIKEN Bioresource Center, Ibaraki, Japan), respectively.

26 To generate plasmid DNA with mutated codons or deletions, site-directed mutagenesis method

1 was performed using PrimeSTAR Max DNA Polymerase (Takara Bio Inc., Shiga, Japan). To  
2 generate plasmid DNA with insertions, PCR amplified fragments and linearized vector by restriction  
3 enzyme digestion were assembled using In-Fusion HD Cloning Kit (Takara Bio Inc.).

4 pEGFPN3-ARL4C was constructed as previously described(Matsumoto et al, 2014). Full length  
5 cDNAs of GRP1 and MMP14 ORF were reversely transcribed from mRNA extracted from MCF-7  
6 cells and U2OS cells, respectively. Linear double strand oligonucleotides of the C-terminal 22 amino  
7 acids of KRAS, which includes the PBR and CAAX motifs, were synthesized, and the  
8 oligonucleotides were inserted into C terminal of ARL4C-EGFP or ARL4C-FLAG-HA using In-  
9 Fusion HD Cloning Kit (Takara Bio Inc.).

10 Standard recombinant DNA techniques mentioned above were used to construct the following  
11 plasmids: pEGFPN3-ARL4C, pEGFPN3-ARL4C<sup>G2A</sup>, pEGFPN3-ARL4C<sup>T27N</sup>, pEGFPN3-  
12 ARL4C<sup>Q72L</sup>, pEGFPN3-ARL4C<sup>ΔPBR</sup>, pEGFPN3-ARL4C<sup>G2A</sup>-EGFP-PLCδ<sup>PH</sup>, pEGFPN3-ARL4C<sup>G2A</sup>-  
13 EGFP-GRP1<sup>PH</sup>, pEGFPN3-ARL4C<sup>G2A</sup>-EGFP-Cterm, pEGFPN3-ARL4C<sup>ΔPBR</sup>-EGFP-Cterm,  
14 pEGFPC1-CHD, pEGFPC1-IQ, pEGFPC1-WW, pEGFPC1-IR, pEGFPC1-GRD, pEGFPC1-RGCT,  
15 pcDNA3-ARL4C-FLAG-HA, pcDNA3-ARL4C<sup>G2A</sup>-FLAG-HA, pcDNA3-ARL4C<sup>ΔPBR</sup>-FLAG-HA,  
16 pcDNA3-ARL4C<sup>G2A</sup>-FLAG-HA-Cterm, pcDNA3-ARL4C<sup>ΔPBR</sup>-FLAG-HA-Cterm, pcDNA3-FLAG-  
17 HA-IQGAP1, pmCherryN1-ARL4C, pmCherryN1-MMP14, pmCherryN1-MMP14ΔC(Δ563-582),  
18 pCAG-ARL4C-tdTomato. To construct lentiviral vectors harboring EGFP, ARL4C-EGFP,  
19 ARL4C<sup>G2A</sup>-EGFP, ARL4C<sup>T27N</sup>-EGFP, ARL4C<sup>Q72L</sup>-EGFP, ARL4C<sup>ΔPBR</sup>-EGFP, ARL4C<sup>G2A</sup>-EGFP-  
20 Cterm, ARL4C<sup>ΔPBR</sup>-EGFP-Cterm, ARL4C<sup>G2A</sup>-EGFP-PLCδPH, ARL4C<sup>G2A</sup>-EGFP-GRP1PH, EGFP-  
21 IQGAP1, ARLC-mCherry, MMP14-mCherry, MMP14ΔC-mCherry, ARL4C-tdTomato were cloned  
22 into CSII-CMV-MCS-IRES2-Bsd provided by Dr. H. Miyoshi (RIKEN Bioresource Center, Ibaraki,  
23 Japan).

24

## 25 **Patients and cancer tissues**

26 The present study involved 57 presurgical untreated patients with PDAC and ages ranging from 47 to

1 87 years (median, 70 years) who underwent surgical resection at Osaka University between April  
2 2001 and April 2015. Tumors were staged according to the Union for International Cancer Control  
3 (UICC) TNM staging system. Resected specimens were fixed in 10% (vol/vol) formalin, processed  
4 for paraffin embedding, and were sectioned at 5  $\mu$ m thickness and stained with hematoxylin and  
5 eosin (H&E) or immunoperoxidase for independent evaluations. The protocol for this study was  
6 approved by the ethical review board of the Graduate School of Medicine, Osaka University, Japan  
7 (No. 13455), under the Declaration of Helsinki, and written informed consent was obtained from all  
8 patients. The study was performed in accordance with Committee guidelines and regulations.

9

### 10 **Immunohistochemical studies**

11 Immunohistochemical studies were performed as previously described (Fujii et al, 2015) with  
12 modification. Briefly, all tissue sections were stained using a DakoReal EnVision Detection System  
13 (Dako, Carpinteria, CA, USA) in accordance with the manufacturer's recommendations. Formalin-  
14 fixed, paraffin-embedded tissue specimens for examination were sectioned at 5- $\mu$ m thickness. Heat-  
15 induced epitope retrieval was performed using Decloaking Chamber NxGen (Biocare Medical,  
16 Walnut Creek, CA, USA). Tissue peroxidase activity was blocked with Peroxidase-Blocking  
17 Solution (Dako) for 30 min, and the sections were then incubated with G-Block (GenoStaff, Tokyo,  
18 Japan) or Blocking One Histo (nacalai tesque, Kyoto, Japan) for 30 min or 10 min, respectively, to  
19 block nonspecific antibody binding sites. Tissue specimens were treated with anti-ARL4C (1:100),  
20 anti-IQGAP1 (1:800), or anti-MMP14 (1:100) antibody for 3 h at room temperature. Then, the  
21 specimens were detected by incubating with goat anti-rabbit or anti-rabbit/mouse IgG-HRP for 1 h  
22 and subsequently with DAB (Dako). The tissue sections were then counterstained with 0.1% (wt/vol)  
23 hematoxylin. ARL4C expression was considered high when the total area of the tumor stained with  
24 anti-ARL4C antibody exceeded 5%. IQGAP1 expression was considered high when the total area of  
25 the tumor stained with anti-IQGAP1 antibody exceeded 40%.

26 IQGAP1 staining positivity in PDAC patients was measured using HALO (Indica Labs,

1 Corrales, NM, USA). The threshold for positive or negative staining was based on the optical density  
2 of the staining: regions above the positivity threshold were scored according to the optical density  
3 threshold set in the module; weakly positive is shown in yellow and strongly positive in red. The  
4 samples were viewed and analyzed using NanoZoomer-SQ (Hamamatsu Photonics K.K., Shizuoka,  
5 Japan).

6

### 7 **Clinical data analyses using open sources**

8 The data on ARL4C and IQGAP1 mRNA expression in pancreatic adenocarcinoma were obtained  
9 from the UCSC Xena browser (<http://xena.ucsc.edu>). Tumors and normal samples in the UCSC Xena  
10 browser were derived from The Cancer Genome Atlas (TCGA) and Genotype-Tissue Expression  
11 (GTEx) projects. Differential analysis was performed using a two-tailed Student's t-test. The  
12 correlations of overall survival rates with ARL4C, IQGAP1, and MMP14 expression in pancreatic  
13 cancer in TCGA datasets were analyzed using a Kaplan–Meier plotter (<http://www.kmplot.com>) and  
14 visualized using GraphPad Prism (GraphPad Software, San Diego, CA, USA). High and low  
15 expression groups were classified by auto select best cutoff. *P* values and *r* values were calculated  
16 using GraphPad Prism.

17

### 18 **3D gel invasion assay using a 3D microfluidic cell culture chip**

19 Collagen gels were made by diluting and neutralizing rat tail type I collagen (Corning Inc., Corning,  
20 NY, USA) in PBS and 12.1 mM NaOH, and was adjusted to 2 mg/mL. DQ™-collagen type I (Life  
21 Technologies/Thermo Fisher Scientific, Carlsbad, CA, USA) was mixed with collagen gels at a final  
22 concentration of 25 µg/mL. The gel channel of 3D microfluidic cell culture chip (AIM Biotech,  
23 Biopolis Rd, Singapore) was filled with collagen solution and incubated at 37°C for at least 1 h to  
24 polymerize collagen. After hydration of medium channels, a cell suspension ( $1 \times 10^4$  cells) in serum-  
25 free cell culture medium with 0.2% BSA was injected into one of the ports at the medium channel.  
26 The opposite medium channel was filled with cell culture medium containing 10% FBS to create a

1 chemoattractant gradient across the collagen gel. The cells were then incubated for 3 days and fixed  
2 for 15 min at room temperature in PBS containing 4% (w/v) paraformaldehyde. Then, the cells were  
3 permeabilized and blocked in PBS containing 0.5% (w/v) Triton X-100 and 40 mg/mL BSA for 30  
4 min and stained with the indicated antibodies. The samples were viewed and analyzed under an  
5 LSM880 laser scanning microscope (Carl Zeiss, Jana, Germany). Reconstruction of confocal z-stack  
6 images into 3D animations and analysis of 4D images were performed using Imaris (Bitplane,  
7 Belfast, UK).

8

### 9 **Invadopodia assay**

10 QCM™ Gelatin Invadopodia Assay (Red) (Merck Millipore, Burlington, MA, USA) was used in  
11 accordance with the manufacturer's protocol. Briefly, poly-L-lysine-coated coverslips were treated  
12 with glutaraldehyde. The coverslips were then incubated with Cy3-labeled gelatin, followed by  
13 culture medium quenching of free aldehydes. Cells ( $6 \times 10^4$  cells) were seeded onto the gelatin-  
14 coated coverslips and incubated for 4 h. After incubation, the cells were fixed for 20 min at room  
15 temperature in phosphate-buffered saline (PBS) containing 4% (w/v) paraformaldehyde and  
16 permeabilized in PBS containing 0.2% (w/v) Triton X-100 for 10 min. After being blocked in PBS  
17 containing 0.2% (w/v) BSA for 30 min, the cells were immunohistochemically stained. The samples  
18 were viewed and analyzed under an LSM880 laser scanning microscope (Carl Zeiss, Jana,  
19 Germany).

20

### 21 **2D culture on poly-D-lysine- or Matrigel-coated dishes**

22 Cells grown on glass coverslips coated with poly-D-lysine (Sigma-Aldrich) or Matrigel (Corning  
23 Inc., Corning, NY, USA) were fixed for 10 min at room temperature in PBS containing 4% (w/v)  
24 paraformaldehyde and permeabilized in PBS containing 0.1% (w/v) saponin (Sigma-Aldrich) or  
25 0.2% (w/v) Triton X-100 for 10 min. The cells were then blocked in PBS containing 0.2% (w/v) BSA  
26 for 30 min. They were then incubated with primary antibodies for 3 h at room temperature and with



1 secondary antibodies in accordance with the manufacturer's protocol (Life Technologies/Thermo  
2 Fisher Scientific). For cell surface MMP14 staining, samples were incubated with anti-MMP14  
3 antibody for 3 h at room temperature without permeabilization. The samples were viewed and  
4 analyzed under an LSM880 laser scanning microscope (Carl Zeiss).

5

### 6 **Migration and invasion assays**

7 Migration and invasion assays were performed using a modified Boyden chamber (8  $\mu\text{m}$  pores;  
8 Corning) and a Matrigel-coated modified Boyden chamber (8  $\mu\text{m}$  pores; BD Biosciences, Franklin  
9 Lakes, NJ, USA), respectively as described previously (Kurayoshi et al, 2006; Matsumoto et al, 2014).  
10 In the standard conditions, S2-CP8 cells ( $2.5 \times 10^4$  cells) were seeded in the upper side of Boyden  
11 Chamber. In GFP-expressing S2-CP8 cells, after 4 h (migration assay) or 24 h (invasion assay, except  
12 for Figure 6E) incubation with control ASO, 122 cells (average) and 126 cells (average), respectively,  
13 were observed in the lower side chamber in the one field of view under fluorescence microscope (BZ-  
14 9000, Keyence, Osaka, Japan) using a 10x air objective. In Figure 6E, cells were observed after 20 h  
15 incubation with ASO. Migration and invasion rates of cells expressing ARL4C, IQGAP1, and MMP14  
16 mutants were calculated as the percentages of the same cells transfected with control ASO or siRNA.

17

### 18 **3D type I collagen gel culture**

19 Collagen gels were made by diluting and neutralizing rat tail type I collagen (Corning) in PBS and  
20 12.1 mM NaOH, and was adjusted to 2 mg/mL. Then, 140  $\mu\text{L}$  of cell-embedded collagen gels ( $1 \times 10^6$   
21 cells/mL) were overlaid onto glass coverslips in a 24-well plate and allowed to polymerize for at least  
22 1 h at 37°C and 5%  $\text{CO}_2$ . After polymerization, growth medium was added on top of the collagen gel.  
23 The cells were then incubated for 3 days and fixed for 15 min at room temperature in PBS containing  
24 4% (w/v) paraformaldehyde. Then, the cells were permeabilized and blocked in PBS containing 0.5%  
25 (w/v) Triton X-100 and 40 mg/mL BSA for 30 min and incubated with primary antibodies for 3 h at  
26 room temperature and secondary antibodies in accordance with the manufacturer's protocol (Life

1 Technologies/Thermo Fisher Scientific). The samples were viewed and analyzed under an LSM880  
2 laser scanning microscope using a 20x air objective (Carl Zeiss). In the standard conditions (for Figure  
3 3L) with BxPC-3/ARL4C-GFP cells treated with control ASO, the number of cells with protrusions  
4 and the total number of cells were 15 (average) and 76 (average), respectively, in the one field of view  
5 under an LSM880 laser scanning microscope (Carl-Zeiss) using a 20x air objective. The percentages  
6 of cells with protrusions compared with the total number of cells in the presence of control siRNA or  
7 IQGAP1 siRNA were calculated.

8

### 9 **Inducible recruitment of phospholipid phosphatases**

10 mRFP-FKBP-5-ptase-dom and PM-FRB-CFP plasmids were obtained from Addgene (deposited by  
11 the laboratory of T. Balla). S2-CP8 cells were then transiently transfected with both mRFP-FKBP-5-  
12 ptase-dom and PM-FRB-CFP (0.5 µg/well of a 6-well plate for each vector) with ViaFect (Promega  
13 Corp.). After 24 h culture, the cells were treated with 100 nM rapamycin or 50 µM LY294002 for 30  
14 min before fixation.

15

### 16 **Isolation of ARL4C-interacting protein**

17 Confluent X293T cells transiently transfected with ARL4C-FLAG-HA in two 10-cm culture dishes  
18 were harvested and lysed in 800 µL of lysis buffer (25mM Tris-HCl [pH7.5], 50 mM NaCl, 0.5%  
19 TritonX-100) with protease inhibitors (nacalai tesque). After 10 min of centrifugation, lysates were  
20 incubated with 40 µL of 50% slurry of anti-FLAG Affinity Gel for 30 min, and then add another 40  
21 µL and incubated for 30 min. Beads were washed 3 times with 1 mL of lysis buffer. Recovered beads  
22 were incubated once with FLAG peptide (0.5 mg/mL) to elute proteins in 80 µL of PBS for 30 min at  
23 4°C. Then, the supernatant was precleaned with 40 µL of 50% slurry of protein A Sepharose beads  
24 (GE Healthcare, Chicago, IL, USA) for 30 min at 4°C. The precleaned lysates were incubated with 2  
25 µg of anti-HA antibody (Santa Cruz, Dallas, TX, USA) and 50 µL of 50% slurry of protein A  
26 Sepharose beads for 1 h at 4°C. Beads were washed 3 times with 1 mL of lysis buffer, and bound

1 complexes were dissolved in 50  $\mu$ L of Laemmli's sample buffer. The ARL4C-FLAG-HA-interacting  
2 proteins were detected by silver staining (Life Technologies/Thermo Fisher Scientific). Nine bands  
3 (arrowheads in Figure 3A) were cut from the gel and analyzed by mass spectrometry.

4

### 5 **Immunoprecipitation**

6 Immunoprecipitation were performed as described previously with modification(Matsumoto et al,  
7 2014). For Figure 3C, S2-CP8 cells (60-mm diameter dish) were lysed in 300  $\mu$ L of lysis buffer (25  
8 mM Tris-HCl [pH 7.5, 50 mM NaCl, 0.5% Triton-X100) with protease inhibitors (nacalai tesque) for  
9 10 min on ice. After centrifugation, the supernatant was collected and pre-cleaned using 30  $\mu$ L of  
10 Dynabeads Protein G (Thermo Fisher Scientific). After pre-cleaning, lysates were rotated with  
11 complex of Dynabeads (50  $\mu$ L) and antibody (3.6  $\mu$ g) for 10 min at room temperature. The beads  
12 were then washed with lysis buffer three times, and finally suspended in Laemmli's sample buffer.

13

### 14 **The RAC1 activity assay**

15 The RAC1 activity assay was performed as described(Matsumoto et al, 2014). Briefly, cells were lysed  
16 in 400  $\mu$ L of Rac1 assay buffer (20 mM Tris-HCl [pH 7.5], 150 mM NaCl, 1 mM dithiothreitol, 10  
17 mM MgCl<sub>2</sub>, 1% Triton-X100) with protease inhibitors (nacalai tesque) containing 20  $\mu$ g of  
18 glutathione-S-transferase (GST)-CRIB. After the lysates were centrifuged at 20,000 g for 10 min, the  
19 supernatants were incubated with glutathione-Sepharose (20  $\mu$ l each) for 2 h at 4°C. The beads were  
20 then washed with Rac1 assay buffer three times, and finally suspended in Laemmli's sample buffer.  
21 The precipitates were probed with the anti-Rac1 antibody.

22

### 23 **Imaging of ASO accumulation in tumor-bearing mice**

24 Orthotopic transplantation was performed as described previously(Kim et al, 2009). Ten days after  
25 the transplantation, 150  $\mu$ g/animal (approximately 7.5 mg/kg) of 6-FAM-ARL4CASO-1316 was  
26 subcutaneously administered. Four h after the injection, the fluorescence intensities of various organs

1 were measured *ex vivo* using the IVIS imaging system (Xenogen Corp.). After *ex vivo* imaging,  
2 unfixed mouse pancreas tissues were frozen in an OCT (Sakura Finetek, Tokyo, Japan)/sucrose  
3 mixture [1:1 (v/v) OCT and 1 x PBS containing 30% sucrose]. Freshly frozen tissues were sectioned  
4 at 10  $\mu$ m and fixed for 30 min at room temperature in PBS containing 4% (w/v) paraformaldehyde.  
5 The cells were then permeabilized and blocked in PBS containing 0.5% (w/v) Triton X-100 and 40  
6 mg/mL BSA for 30 min and stained with the indicated antibodies. The samples were viewed and  
7 analyzed under an LSM880 laser scanning microscope (Carl Zeiss).

8

### 9 **Orthotopic xenograft tumor assay**

10 An orthotopic transplantation assay was performed as described previously (Kim et al, 2009) with  
11 modification. Ten-week-old male BALB/cAJcl-nu/nu mice (nude mice; CLEA, Tokyo, Japan) were  
12 anesthetized and received an orthotopic injection of S2-CP8 cells into the mid-body of the pancreas  
13 using a 27 G needle ( $5 \times 10^5$  cells suspended in 100  $\mu$ L of HBSS with 50% Matrigel). ASOs (50  
14  $\mu$ g/mouse, approximately 2.5 mg/kg) were administered subcutaneously twice a week from day 3.  
15 Tumor burden was measured once a week using the IVIS imaging system (Xenogen Corp., Alameda,  
16 CA, USA). For the *in vivo* imaging, 100  $\mu$ L of VivoGlo luciferin (30 mg/mL) was intraperitoneally  
17 administered and the bioluminescence imaging was performed 8 min later. The region of interest  
18 (ROI) was selected and the radiance values measured with Living Image 4.3.1 Software (Caliper Life  
19 Sciences, Hopkinton, MA, USA). The mice were euthanized 28 days after transplantation. Tumor  
20 weights and numbers of mesenteric lymph nodes (diameter of lymph nodes > 1 mm) were measured.  
21 All protocols used for the animal experiments in this study were approved by the Animal Research  
22 Committee of Osaka University, Japan (No. 26-032-048).

23

### 24 **RNA sequencing**

25 Sequenced reads were preprocessed by Trim Galore! v0.6.3 and quantified by Salmon v0.14.0 with  
26 the flags gcBias and validateMappings. GENCODE vM21 annotation was used as the transcript

1 reference. The quantified transcript-level scaled TPM was summarized into a gene-level scaled TPM  
2 by using the R package tximport v1.6.0. All procedures were implemented using the RNAseq  
3 pipeline ikra v1.2.2 [<http://doi.org/10.5281/zenodo.3352573>] with the default parameters.  
4 Downstream analysis was conducted with an integrative RNAseq analysis platform, iDEP.90. After  
5 normalization with VST, principal component analysis was conducted. Hierarchical clustering was  
6 performed on the top 1,000 genes in terms of their standard deviation. Finally, DEGs were selected  
7 with a log<sub>2</sub> fold change > 1 and false discovery rate < 0.1.

8

### 9 **Ingenuity Pathway Analysis (IPA)**

10 DEGs identified from RNA sequence data were subjected to Ingenuity Pathway Analysis (IPA;  
11 Qiagen, Hilden, Germany). This analysis examines DEGs that are known to affect each biological  
12 function and compares their direction of change to what is expected from the literature. To infer the  
13 activation states of implicated biological functions, two statistical quantities, Z-score and *P* value,  
14 were used. A positive or negative Z-score value indicates that biological functions are predicted to be  
15 activated or inhibited in the ARL4C ASO-1316–treated group relative to the control ASO-treated  
16 group. A negative Z-score means that the indicated biological functions are inhibited by ARL4C  
17 ASO-1316. The *P* value, calculated with the Fisher's exact test, reflects the enrichment of the DEGs  
18 on each pathway. For stringent analysis, only biological functions with a  $|Z\text{-score}| > 2$  were  
19 considered significant.

20

### 21 **Statistics and Reproducibility**

22 Biological replicates are replicates on independent biological samples versus technical replicates that  
23 use the same starting samples. All experiments in this study were repeated using biological  
24 replicates. A minimum of three biological replicates were analyzed for all samples, and the results  
25 are presented as the mean ± s.d. or s.e.m. The cumulative probabilities of overall survival were  
26 determined using the Kaplan–Meier method; a log-rank test was used to assess statistical



1 significance. The Student's t-test or Mann–Whitney test was used to determine if there was a  
2 significant difference between the means of two groups. One-way analysis of variance (ANOVA)  
3 with Bonferroni tests was used to compare three or more group means. Statistical analysis was  
4 performed using Excel Toukei (ESUMI Co., Ltd., Tokyo, Japan);  $P < 0.05$  was considered  
5 statistically significant. In box and whiskers plots, the top and bottom horizontal lines represent the  
6 75<sup>th</sup> and the 25<sup>th</sup> percentiles, respectively, and the middle horizontal line represents the median. The  
7 size of the box represents the interquartile range and the top and bottom whiskers represent the  
8 maximum and the minimum values, respectively.

9

## 10 **Others**

11 The siRNAs and primers used in these experiments are listed in Supplementary file 1 Table 7 and 8,  
12 respectively. 2.5D Matrigel growth assay and quantitative PCR were performed as described  
13 previously(Matsumoto et al, 2019; Sato et al, 2010).

14

15

## 1 **Acknowledgements**

2 This work was supported by Grants-in-Aids for Scientific Research to A.K. (2016-2020) (No.  
3 16H06374) and Grants-in-Aid for Scientific Research on Innovative Areas, “Organelle zone” to A.K.  
4 (2018-2019) (No. 18H04861) and “Cell diverse” to A.K. (2018-2019) (No. 18H05101) from the  
5 Ministry of Education, Culture, Sports, Science and Technology of Japan, by grants from the Yasuda  
6 Memorial Foundation and the Ichiro Kanehara Foundation of the Promotion of Medical Science &  
7 Medical Care to A.K., and by Integrated Frontier Research for Medical Science Division, Institute  
8 for Open and Transdisciplinary Research Initiatives, Osaka University to A.K.

9 We thank the NGS core facility of the Genome Information Research Center at the Research  
10 Institute for Microbial Diseases of Osaka University for the data analysis support.

11 This study was supported by Eiji Oiki, Yuri Terao, and Center for Medical Research and  
12 Education, Graduate School of Medicine, Osaka University. Also this study was supported by Saki  
13 Ishino and Center of Medical Innovation and Translational Research, Osaka University.

14

## 15 **Author contributions**

16 Conceptualizaion: A.H., S.M. and A.K.; Methodology: A.H., S.M., T.A. and A.K.; Investigation:  
17 A.H., S.M. and Y.Y.; Resources: H.E.; Writing-original draft: A.H., S.M. and A.K.; Writing-review  
18 and editing: A.H., S.M., Y.Y., H.E. and A.K.; Supervision: A.K.; Project administration: A.H., S.M.  
19 and A.K.; Funding acquisition: A.K.

20

## 21 **Conflict of interest**

22 All authors have declared no conflicts of interest.

23

## 24 **Data availability**

25 All data generated or analysed during this study are included in the manuscript and supporting files.

26

1 The following previously published data sets were used.

2 Normalized RNA-seq data and clinical information of pancreatic ductal adenocarcinoma samples  
3 from The Cancer Genome Atlas (TCGA) Research Network were downloaded from UCSC Xena  
4 website (<https://xenabrowser.net/datapages/>, 2020\_04\_07\_run). Patients with missing or insufficient  
5 data were excluded from this research.

6

7 The following data sets were generated.

8 Akikazu Harada, Akira Kikuchi (2021)

9 ID DRA011537.

10 Effects of ARL4C ASO on an orthotopic transplantation model.

11

## 12 **Supplementary files**

13 Figure 2-video 1; ARL4C accumulates at the tips of membrane protrusions.

14 Legend for Figure 2-video 1 is as follows.

15 S2-CP8 cells stably expressing ARL4C-tdTomato were subjected to the 3D gel invasion assay and  
16 were observed with time-lapse imaging and the video was acquired for 78 min. Cells were imaged  
17 every 3 min.

18

19 Figure 1-figure supplement 1

20 Figure 2-figure supplement 1

21 Figure 2-figure supplement 2

22 Figure 3-figure supplement 1

23 Figure 3-figure supplement 2

24 Figure 4-figure supplement 1

25 Figure 5-figure supplement 1

26 Figure 6-figure supplement 1

- 1 Figure 7-figure supplement 1
- 2 Figure 1-source data; Excel file containing quantitative data for Figure 1.
- 3 Figure 2-source data; Excel file containing quantitative data for Figure 2.
- 4 Figure 3-source data; Excel file containing quantitative data for Figure 3.
- 5 Figure 4-source data; Excel file containing quantitative data for Figure 4.
- 6 Figure 5-source data; Excel file containing quantitative data for Figure 5.
- 7 Figure 6-source data; Excel file containing quantitative data for Figure 6.
- 8 Figure 7-source data; Excel file containing quantitative data for Figure 7.
- 9 Figure 2-figure supplement 1-source data; Excel file containing quantitative data for Figure 2-figure
- 10 supplement 1.
- 11 Figure 2-figure supplement 2-source data; Excel file containing quantitative data for Figure 2-figure
- 12 supplement 2.
- 13 Figure 3-figure supplement 1-source data; Excel file containing quantitative data for Figure 3-figure
- 14 supplement 1.
- 15 Figure 3-figure supplement 2-source data; Excel file containing quantitative data for Figure 3-figure
- 16 supplement 2.
- 17 Figure 6-figure supplement 1-source data; Excel file containing quantitative data for Figure 6-figure
- 18 supplement 1.
- 19 Figure 7-figure supplement 1-source data; Excel file containing quantitative data for Figure 7-figure
- 20 supplement 1.
- 21 Supplementary file 1 Tables 1-8
- 22

1 **References**

- 2
- 3 Briggs MW, Sacks DB (2003) IQGAP proteins are integral components of cytoskeletal regulation. *EMBO Rep*
- 4 **4**: 571-574: 10.1038/sj.embor.embor867
- 5
- 6 Burd CG, Strohlic TI, Gangi Setty SR (2004) Arf-like GTPases: not so Arf-like after all. *Trends Cell Biol* **14**:
- 7 687-694: 10.1016/j.tcb.2004.10.004
- 8
- 9 Castellano E, Downward J (2011) RAS Interaction with PI3K: More Than Just Another Effector Pathway. *Genes*
- 10 *Cancer* **2**: 261-274: 10.1177/1947601911408079
- 11
- 12 Caswell PT, Zech T (2018) Actin-Based Cell Protrusion in a 3D Matrix. *Trends Cell Biol* **28**: 823-834:
- 13 10.1016/j.tcb.2018.06.003
- 14
- 15 Collins MA, Bednar F, Zhang Y, Brisset JC, Galban S, Galban CJ, Rakshit S, Flannagan KS, Adsay NV, Pasca di
- 16 Magliano M (2012) Oncogenic Kras is required for both the initiation and maintenance of pancreatic cancer in
- 17 mice. *J Clin Invest* **122**: 639-653: 10.1172/JCI59227
- 18
- 19 Dalaka E, Kronenberg NM, Liehm P, Segall JE, Prystowsky MB, Gather MC (2020) Direct measurement of
- 20 vertical forces shows correlation between mechanical activity and proteolytic ability of invadopodia. *Sci Adv* **6**:
- 21 eaax6912: 10.1126/sciadv.aax6912
- 22
- 23 Di Paolo G, De Camilli P (2006) Phosphoinositides in cell regulation and membrane dynamics. *Nature* **443**:
- 24 651-657: 10.1038/nature05185
- 25
- 26 Donaldson JG, Jackson CL (2011) ARF family G proteins and their regulators: roles in membrane transport,
- 27 development and disease. *Nat Rev Mol Cell Biol* **12**: 362-375: 10.1038/nrm3117
- 28
- 29 Engel T, Lueken A, Bode G, Hobohm U, Lorkowski S, Schlueter B, Rust S, Cullen P, Pech M, Assmann G,
- 30 Seedorf U (2004) ADP-ribosylation factor (ARF)-like 7 (ARL7) is induced by cholesterol loading and
- 31 participates in apolipoprotein AI-dependent cholesterol export. *FEBS Lett* **566**: 241-246:
- 32 10.1016/j.febslet.2004.04.048
- 33
- 34 Farahat WA, Wood LB, Zervantonakis IK, Schor A, Ong S, Neal D, Kamm RD, Asada HH (2012) Ensemble
- 35 analysis of angiogenic growth in three-dimensional microfluidic cell cultures. *PLoS One* **7**: e37333:
- 36 10.1371/journal.pone.0037333
- 37
- 38 Fujii S, Matsumoto S, Nojima S, Morii E, Kikuchi A (2015) Arl4c expression in colorectal and lung cancers



1 promotes tumorigenesis and may represent a novel therapeutic target. *Oncogene* **34**: 4834-4844:  
2 10.1038/onc.2014.402  
3  
4 Fujii S, Shinjo K, Matsumoto S, Harada T, Nojima S, Sato S, Usami Y, Toyosawa S, Morii E, Kondo Y, Kikuchi  
5 A (2016) Epigenetic upregulation of ARL4C, due to DNA hypomethylation in the 3'-untranslated region,  
6 promotes tumorigenesis of lung squamous cell carcinoma. *Oncotarget* **7**: 81571-81587:  
7 10.18632/oncotarget.13147  
8  
9 Hancock JF, Paterson H, Marshall CJ (1990) A polybasic domain or palmitoylation is required in addition to the  
10 CAAX motif to localize p21ras to the plasma membrane. *Cell* **63**: 133-139:  
11  
12 Harada T, Matsumoto S, Hirota S, Kimura H, Fujii S, Kasahara Y, Gon H, Yoshida T, Itoh T, Haraguchi N,  
13 Mizushima T, Noda T, Eguchi H, Nojima S, Morii E, Fukumoto T, Obika S, Kikuchi A (2019) Chemically  
14 modified antisense oligonucleotide against ARL4C inhibits primary and metastatic liver tumor growth. *Mol*  
15 *Cancer Ther* **18**: 602-612: 10.1158/1535-7163.MCT-18-0824  
16  
17 Hedman AC, Smith JM, Sacks DB (2015) The biology of IQGAP proteins: beyond the cytoskeleton. *EMBO Rep*  
18 **16**: 427-446: 10.15252/embr.201439834  
19  
20 Heo WD, Inoue T, Park WS, Kim ML, Park BO, Wandless TJ, Meyer T (2006) PI(3,4,5)P3 and PI(4,5)P2 lipids  
21 target proteins with polybasic clusters to the plasma membrane. *Science* **314**: 1458-1461:  
22 10.1126/science.1134389  
23  
24 Hidalgo M (2010) Pancreatic cancer. *N Engl J Med* **362**: 1605-1617: 10.1056/NEJMra0901557  
25  
26 Hofmann I, Thompson A, Sanderson CM, Munro S (2007) The Arl4 family of small G proteins can recruit the  
27 cytohesin Arf6 exchange factors to the plasma membrane. *Curr Biol* **17**: 711-716: 10.1016/j.cub.2007.03.007  
28  
29 Jacquemet G, Green DM, Bridgewater RE, von Kriegsheim A, Humphries MJ, Norman JC, Caswell PT (2013)  
30 RCP-driven  $\alpha 5\beta 1$  recycling suppresses Rac and promotes RhoA activity via the RacGAP1-IQGAP1 complex. *J*  
31 *Cell Biol* **202**: 917-935: 10.1083/jcb.201302041  
32  
33 Jiang A, Lehti K, Wang X, Weiss SJ, Keski-Oja J, Pei D (2001) Regulation of membrane-type matrix  
34 metalloproteinase 1 activity by dynamin-mediated endocytosis. *Proc Natl Acad Sci USA* **98**: 13693-13698:  
35 10.1073/pnas.241293698  
36  
37 Johnson M, Sharma M, Henderson BR (2009) IQGAP1 regulation and roles in cancer. *Cell Signal* **21**: 1471-  
38 1478: 10.1016/j.cellsig.2009.02.023

- 1  
2 Keleg S, Buchler P, Ludwig R, Buchler MW, Friess H (2003) Invasion and metastasis in pancreatic cancer. *Mol*  
3 *Cancer* **2**: 14:  
4  
5 Kim MP, Evans DB, Wang H, Abbruzzese JL, Fleming JB, Gallick GE (2009) Generation of orthotopic and  
6 heterotopic human pancreatic cancer xenografts in immunodeficient mice. *Nat Protoc* **4**: 1670-1680:  
7 10.1038/nprot.2009.171  
8  
9 Kimura H, Fumoto K, Shojima K, Nojima S, Osugi Y, Tomihara H, Eguchi H, Shintani Y, Endo H, Inoue M,  
10 Doki Y, Okumura M, Morii E, Kikuchi A (2016) CKAP4 is a Dickkopf1 receptor and is involved in tumor  
11 progression. *J Clin Invest* **126**: 2689-2705: 10.1172/JCI84658  
12  
13 Kimura K, Matsumoto S, Harada T, Morii E, Nagatomo I, Shintani Y, Kikuchi A (2020) ARL4C is associated  
14 with initiation and progression of lung adenocarcinoma and represents a therapeutic target. *Cancer Sci* **111**: 951-  
15 961: 10.1111/cas.14303  
16  
17 Klein AP (2013) Identifying people at a high risk of developing pancreatic cancer. *Nat Rev Cancer* **13**: 66-74:  
18 10.1038/nrc3420  
19  
20 Kurayoshi M, Oue N, Yamamoto H, Kishida M, Inoue A, Asahara T, Yasui W, Kikuchi A (2006) Expression of  
21 Wnt-5a is correlated with aggressiveness of gastric cancer by stimulating cell migration and invasion. *Cancer Res*  
22 **66**: 10439-10448: 10.1158/0008-5472.CAN-06-2359  
23  
24 Lemmon MA (2008) Membrane recognition by phospholipid-binding domains. *Nat Rev Mol Cell Biol* **9**: 99-  
25 111: 10.1038/nrm2328  
26  
27 Liang D, Shi S, Xu J, Zhang B, Qin Y, Ji S, Xu W, Liu J, Liu L, Liu C, Long J, Ni Q, Yu X (2016) New insights  
28 into perineural invasion of pancreatic cancer: More than pain. *Biochim Biophys Acta* **1865**: 111-122:  
29 10.1016/j.bbcan.2016.01.002  
30  
31 Maffucci T, Falasca M (2001) Specificity in pleckstrin homology (PH) domain membrane targeting: a role for a  
32 phosphoinositide-protein co-operative mechanism. *FEBS Lett* **506**: 173-179: 10.1016/s0014-5793(01)02909-x  
33  
34 Matsumoto S, Fujii S, Kikuchi A (2017) Arl4c is a key regulator of tubulogenesis and tumorigenesis as a target  
35 gene of Wnt- $\beta$ -catenin and growth factor-Ras signalling. *J Biochem* **161**: 27-35: 10.1093/jb/mvw069  
36  
37 Matsumoto S, Fujii S, Sato A, Ibuka S, Kagawa Y, Ishii M, Kikuchi A (2014) A combination of Wnt and growth  
38 factor signaling induces Arl4c expression to form epithelial tubular structures. *EMBO J* **33**: 702-718:

- 1 10.1002/embj.201386942
- 2
- 3 Matsumoto S, Yamamichi T, Shinzawa K, Kasahara Y, Nojima S, Kodama T, Obika S, Takehara T, Morii E,  
4 Okuyama H, Kikuchi A (2019) GREB1 induced by Wnt signaling promotes development of hepatoblastoma by  
5 suppressing TGF $\beta$  signaling. *Nat Commun* **10**: 3882: 10.1038/s41467-019-11533-x
- 6
- 7 Murphy DA, Courtneidge SA (2011) The 'ins' and 'outs' of podosomes and invadopodia: characteristics,  
8 formation and function. *Nat Rev Mol Cell Biol* **12**: 413-426: 10.1038/nrm3141
- 9
- 10 Pasqualato S, Renault L, Cherfils J (2002) Arf, Arl, Arp and Sar proteins: a family of GTP-binding proteins with  
11 a structural device for 'front-back' communication. *EMBO Rep* **3**: 1035-1041: 10.1093/embo-reports/kvf221
- 12
- 13 Petrie RJ, Gavara N, Chadwick RS, Yamada KM (2012) Nonpolarized signaling reveals two distinct modes of 3D  
14 cell migration. *J Cell Biol* **197**: 439-455: 10.1083/jcb.201201124
- 15
- 16 Poincloux R, Lizarraga F, Chavrier P (2009) Matrix invasion by tumour cells: a focus on MT1-MMP trafficking  
17 to invadopodia. *J Cell Sci* **122**: 3015-3024: 10.1242/jcs.034561
- 18
- 19 Rodriguez-Viciano P, Warne PH, Dhand R, Vanhaesebroeck B, Gout I, Fry MJ, Waterfield MD, Downward J  
20 (1994) Phosphatidylinositol-3-OH kinase as a direct target of Ras. *Nature* **370**: 527-532:
- 21
- 22 Sakurai-Yageta M, Recchi C, Le Dez G, Sibarita JB, Daviet L, Camonis J, D'Souza-Schorey C, Chavrier P (2008)  
23 The interaction of IQGAP1 with the exocyst complex is required for tumor cell invasion downstream of Cdc42  
24 and RhoA. *J Cell Biol* **181**: 985-998: 10.1083/jcb.200709076
- 25
- 26 Sato A, Yamamoto H, Sakane H, Koyama H, Kikuchi A (2010) Wnt5a regulates distinct signalling pathways by  
27 binding to Frizzled2. *EMBO J* **29**: 41-54: emboj2009322 [pii]  
28 10.1038/emboj.2009.322
- 29
- 30 Saykali BA, El-Sibai M (2014) Invadopodia, regulation, and assembly in cancer cell invasion. *Cell Commun*  
31 *Adhes* **21**: 207-212: 10.3109/15419061.2014.923845
- 32
- 33 Shin Y, Han S, Jeon JS, Yamamoto K, Zervantonakis IK, Sudo R, Kamm RD, Chung S (2012) Microfluidic assay  
34 for simultaneous culture of multiple cell types on surfaces or within hydrogels. *Nat Protoc* **7**: 1247-1259:  
35 10.1038/nprot.2012.051
- 36
- 37 Suh BC, Inoue T, Meyer T, Hille B (2006) Rapid chemically induced changes of PtdIns(4,5)P2 gate KCNQ ion  
38 channels. *Science* **314**: 1454-1457: 10.1126/science.1131163

1  
2  
3  
4  
5  
6  
7  
8  
9  
10  
11  
12  
13  
14  
15  
16  
17  
18  
19  
20  
21  
22  
23  
24  
25  
26

Toker A, Cantley LC (1997) Signalling through the lipid products of phosphoinositide-3-OH kinase. *Nature* **387**: 673-676: 10.1038/42648

Waddell N, Pajic M, Patch AM, Chang DK, Kassahn KS, Bailey P, Johns AL, Miller D, Nones K, Quek K, Quinn MC, Robertson AJ, Fadlullah MZ, Bruxner TJ, Christ AN, Harliwong I, Idrisoglu S, Manning S, Nourse C, Nourbakhsh E, Wani S, Wilson PJ, Markham E, Cloonan N, Anderson MJ, Fink JL, Holmes O, Kazakoff SH, Leonard C, Newell F, Poudel B, Song S, Taylor D, Waddell N, Wood S, Xu Q, Wu J, Pinese M, Cowley MJ, Lee HC, Jones MD, Nagrial AM, Humphris J, Chantrill LA, Chin V, Steinmann AM, Mawson A, Humphrey ES, Colvin EK, Chou A, Scarlett CJ, Pinho AV, Giry-Laterriere M, Rooman I, Samra JS, Kench JG, Pettitt JA, Merrett ND, Toon C, Epari K, Nguyen NQ, Barbour A, Zeps N, Jamieson NB, Graham JS, Niclou SP, Bjerkvig R, Grutzmann R, Aust D, Hruban RH, Maitra A, Iacobuzio-Donahue CA, Wolfgang CL, Morgan RA, Lawlor RT, Corbo V, Bassi C, Falconi M, Zamboni G, Tortora G, Tempero MA, Australian Pancreatic Cancer Genome I, Gill AJ, Eshleman JR, Pilarsky C, Scarpa A, Musgrove EA, Pearson JV, Biankin AV, Grimmond SM (2015) Whole genomes redefine the mutational landscape of pancreatic cancer. *Nature* **518**: 495-501: 10.1038/nature14169

Wei SM, Xie CG, Abe Y, Cai JT (2009) ADP-ribosylation factor like 7 (ARL7) interacts with alpha-tubulin and modulates intracellular vesicular transport. *Biochem Biophys Res Commun* **384**: 352-356: 10.1016/j.bbrc.2009.04.125

Wolf K, Wu YI, Liu Y, Geiger J, Tam E, Overall C, Stack MS, Friedl P (2007) Multi-step pericellular proteolysis controls the transition from individual to collective cancer cell invasion. *Nat Cell Biol* **9**: 893-904: 10.1038/ncb1616

1 **Table 1.** Univariate analysis and multivariate analysis of overall survival by Cox's Proportional Hazard  
2 model.

| Univariate analysis               |              |          |          |         |
|-----------------------------------|--------------|----------|----------|---------|
| Parameters                        | Hazard ratio | 95% CI   |          | P value |
| ARL4C(low/high)                   | 3.51         | 1.06     | 11.70    | 0.040   |
| Sex(Male/Female)                  | 1.10         | 0.54     | 2.24     | 0.80    |
| Age(<65/≥65)                      | 1.05         | 0.47     | 2.35     | 0.91    |
| Tumor Location(Head/Body or Tail) | 0.41         | 0.18     | 0.94     | 0.036   |
| pStage(IA-IIA/IIB-III)            | 2.51         | 1.17     | 5.41     | 0.019   |
| pT(1-2/3)                         | 5.29         | 1.23     | 22.70    | 0.025   |
| pN(0/1)                           | 2.51         | 1.17     | 5.41     | 0.019   |
| ly(0/1-3)                         | 2.74         | 1.17     | 6.46     | 0.021   |
| v(0/1-3)                          | 2.05         | 1.00     | 4.20     | 0.049   |
| ne(0/1-3)                         | 28258        | 5.25E-36 | 1.52E+44 | 0.83    |

  

| Multivariate analysis |              |        |      |         |
|-----------------------|--------------|--------|------|---------|
| Parameters            | Hazard ratio | 95% CI |      | P value |
| pT(1-2/3)             | 3.72         | 0.78   | 17.7 | 0.099   |
| pN(0/1)               | 1.80         | 0.79   | 4.10 | 0.16    |
| ARL4C(low/high)       | 3.56         | 1.03   | 12.3 | 0.044   |

3 Hazard ratios with 95% confidence intervals (CIs) were calculated using a Cox regression model and  
4 P values were calculated using a log-rank test. CI, confidence interval; pT, primary tumor; pN, regional  
5 lymph node; ly, lymphatic invasion; v, venous invasion; ne, perineural invasion.

6

7

8

9

10
